# Supplementary material for: Rapid screening of novel tyrosinase inhibitory peptides from a pearl shell meat hydrolysate by molecular docking and the anti-melanin mechanism
Source: Royal Society of Chemistry journal article supplement (doi:10.1039/d2fo03105a), 2022-12-23
Supplement: d2fo03105a1.pdf [file d2fo03105a1.pdf]

**Supplementary material of Table S1 for online publication only**

**Table S1. Identification result of tyrosinase inhibitory peptides from <3 kDa  
fraction by LC-MS/MS**

| No. | Peptides        | -10lgP | Mass     | Length | m/z      | RT    |
|-----|-----------------|--------|----------|--------|----------|-------|
| 1   | AARM            | 25.56  | 447.2264 | 4      | 448.2325 | 50.75 |
| 2   | AFR             | 28.25  | 392.2172 | 3      | 393.2244 | 47.77 |
| 3   | AGDLPLW         | 29.67  | 770.3962 | 7      | 771.4037 | 36.21 |
| 4   | AIE             | 30.68  | 331.1743 | 3      | 332.183  | 51.91 |
| 5   | AIHA            | 23.38  | 410.2278 | 4      | 411.2356 | 46.22 |
| 6   | AII             | 32.94  | 315.2158 | 3      | 316.2225 | 47.91 |
| 7   | AIL             | 32.94  | 315.2158 | 3      | 316.2225 | 47.91 |
| 8   | AILL            | 33.51  | 428.2999 | 4      | 429.307  | 31.61 |
| 9   | AILLL           | 24.74  | 541.3839 | 5      | 542.3917 | 39.94 |
| 10  | AILW            | 24.13  | 501.2951 | 4      | 502.3004 | 37.52 |
| 11  | ALE             | 30.68  | 331.1743 | 3      | 332.183  | 51.91 |
| 12  | ALL             | 32.94  | 315.2158 | 3      | 316.2225 | 47.91 |
| 13  | ALLF            | 28.87  | 462.2842 | 4      | 463.2913 | 34.79 |
| 14  | AQR             | 29.17  | 373.2073 | 3      | 374.217  | 58.78 |
| 15  | ARK             | 23.14  | 373.2437 | 3      | 374.2532 | 35.28 |
| 16  | ATFQALGLL       | 20.77  | 932.5331 | 9      | 467.274  | 33.27 |
| 17  | AVR             | 30.14  | 344.2172 | 3      | 345.2266 | 44.2  |
| 18  | AYLVGL          | 20.76  | 634.369  | 6      | 635.3771 | 35.18 |
| 19  | CAAT            | 27.96  | 364.1417 | 4      | 365.1494 | 42.47 |
| 20  | CKT             | 23.78  | 350.1624 | 3      | 351.1699 | 43.65 |
| 21  | CNR             | 27.88  | 391.1638 | 3      | 392.173  | 21.86 |
| 22  | CPE             | 21.44  | 347.1151 | 3      | 348.1228 | 12.23 |
| 23  | CPK             | 25.32  | 346.1675 | 3      | 347.1739 | 48.95 |
| 24  | CPK             | 25.32  | 346.1675 | 3      | 347.1739 | 48.95 |
| 25  | CSG             | 28.64  | 265.0732 | 3      | 266.0807 | 13.32 |
| 26  | CTA             | 23.01  | 293.1046 | 3      | 294.112  | 42.53 |
| 27  | CTKECPPNLQY     | 21.16  | 1294.569 | 11     | 648.2899 | 29.76 |
| 28  | DDFLPPV         | 32.5   | 801.3908 | 7      | 802.3965 | 36.38 |
| 29  | DDPWARDF        | 27.43  | 1020.43  | 8      | 511.2227 | 33.28 |
| 30  | DDFDFP(+15.99)T | 20.92  | 903.365  | 7      | 904.3722 | 35.82 |
| 31  | DFKTDLRFQ       | 52.78  | 1168.588 | 9      | 390.5361 | 28.66 |
| 32  | DGI             | 30.17  | 303.143  | 3      | 304.1513 | 50.04 |
| 33  | DKT             | 25.12  | 362.1801 | 3      | 363.1876 | 50.11 |
| 34  | DLED            | 20.62  | 490.1911 | 4      | 491.1985 | 50.78 |
| 35  | DLVLL           | 22.97  | 571.3581 | 5      | 572.3656 | 36.8  |
| 36  | DQIQFHMNL       | 25.75  | 1144.534 | 9      | 573.2759 | 22.75 |
| 37  | DRF             | 26.94  | 436.207  | 3      | 437.2171 | 29.47 |

|    |                       |       |          |    |          |       |
|----|-----------------------|-------|----------|----|----------|-------|
| 38 | DTDDVPMIL             | 45.68 | 1017.469 | 9  | 1018.476 | 39.01 |
| 39 | DVV                   | 26.6  | 331.1743 | 3  | 332.1833 | 42.49 |
| 40 | DYP                   | 29.55 | 393.1536 | 3  | 394.1621 | 35.61 |
| 41 | EASEAYLVGL            | 33.68 | 1050.523 | 10 | 526.2689 | 36.65 |
| 42 | EDDFLPPV              | 55.85 | 930.4334 | 8  | 931.4408 | 36.57 |
| 43 | EEH                   | 25.32 | 413.1547 | 3  | 414.1631 | 42.51 |
| 44 | EFIL                  | 29.13 | 520.2897 | 4  | 521.2972 | 35.54 |
| 45 | EFLI                  | 29.13 | 520.2897 | 4  | 521.2972 | 35.54 |
| 46 | EGCT                  | 21.3  | 408.1315 | 4  | 409.1391 | 40.5  |
| 47 | EGDSVTVQIN            | 26.84 | 1060.504 | 10 | 531.2558 | 35.95 |
| 48 | EHKE                  | 20.47 | 541.2496 | 4  | 542.2568 | 40.1  |
| 49 | EIAQL                 | 21.43 | 572.317  | 5  | 573.3242 | 30.22 |
| 50 | EIFL                  | 32.69 | 520.2897 | 4  | 521.2972 | 35.54 |
| 51 | EIIP                  | 30.79 | 470.274  | 4  | 471.2804 | 28.46 |
| 52 | EIPIP                 | 23.35 | 567.3268 | 5  | 568.3338 | 26.09 |
| 53 | EKYDCPICLLVL          | 22.95 | 1407.714 | 12 | 704.869  | 21.16 |
| 54 | ELFI                  | 32.69 | 520.2897 | 4  | 521.2972 | 35.54 |
| 55 | ELIL                  | 38.83 | 486.3053 | 4  | 487.3129 | 33.27 |
| 56 | ELIP                  | 30.79 | 470.274  | 4  | 471.2804 | 28.46 |
| 57 | ELLI                  | 38.83 | 486.3053 | 4  | 487.3129 | 33.27 |
| 58 | ELLP                  | 30.79 | 470.274  | 4  | 471.2804 | 28.46 |
| 59 | ELRE                  | 24.69 | 545.2809 | 4  | 546.2908 | 26.98 |
| 60 | EMI                   | 32.38 | 391.1777 | 3  | 392.1851 | 37.84 |
| 61 | ENFPF                 | 24.27 | 652.2856 | 5  | 653.2938 | 35.3  |
| 62 | EPG                   | 28.77 | 301.1274 | 3  | 302.1345 | 48.41 |
| 63 | ERF                   | 26.52 | 450.2227 | 3  | 451.232  | 37.55 |
| 64 | ESLTDPSK LDS          | 22.35 | 1190.567 | 11 | 596.2903 | 27.95 |
| 65 | EVKE                  | 20.66 | 503.2591 | 4  | 504.2646 | 37.38 |
| 66 | EVNP                  | 25.85 | 457.2173 | 4  | 458.2226 | 39.18 |
| 67 | EWL                   | 30.14 | 446.2165 | 3  | 447.2239 | 33.3  |
| 68 | FDF                   | 31.6  | 427.1743 | 3  | 428.1821 | 31.07 |
| 69 | FDFP                  | 24.5  | 524.2271 | 4  | 525.2374 | 33.25 |
| 70 | FDFPTPSR              | 51.63 | 965.4606 | 8  | 483.737  | 28.02 |
| 71 | FDLF                  | 23.14 | 540.2584 | 4  | 541.2658 | 39.29 |
| 72 | FEDTNLC(+119.00)AIH   | 24.87 | 1280.517 | 10 | 427.8456 | 24.04 |
| 73 | FEDTNLC(+119.00)AIHAK | 21.74 | 1479.649 | 12 | 494.2238 | 21.8  |
| 74 | FEFDGF                | 27.19 | 760.3068 | 6  | 761.3129 | 40.23 |
| 75 | FFI                   | 26.36 | 425.2314 | 3  | 426.2383 | 37.4  |
| 76 | FGF                   | 31.19 | 369.1688 | 3  | 370.1762 | 30.15 |
| 77 | FGPF                  | 25.94 | 466.2216 | 4  | 467.2292 | 33.02 |
| 78 | FGQ(+.98)VMN(+.98)    | 23.24 | 696.2789 | 6  | 697.286  | 30.39 |
| 79 | FIF                   | 33.19 | 425.2314 | 3  | 426.2383 | 36.42 |
| 80 | FII                   | 32    | 391.2471 | 3  | 392.2535 | 33.51 |
| 81 | FIL                   | 32    | 391.2471 | 3  | 392.2535 | 33.51 |

|     |                                |       |          |    |          |       |
|-----|--------------------------------|-------|----------|----|----------|-------|
| 82  | FIM                            | 31.35 | 409.2035 | 3  | 410.2115 | 28.88 |
| 83  | FKL                            | 34.21 | 406.258  | 3  | 407.2645 | 33.19 |
| 84  | FLDI                           | 26.15 | 506.274  | 4  | 507.2811 | 43.75 |
| 85  | FLF                            | 33.19 | 425.2314 | 3  | 426.2383 | 36.42 |
| 86  | FLGC                           | 21.55 | 438.1937 | 4  | 439.2008 | 57.01 |
| 87  | FLI                            | 32    | 391.2471 | 3  | 392.2535 | 33.51 |
| 88  | FLL                            | 32    | 391.2471 | 3  | 392.2535 | 33.51 |
| 89  | FLLE                           | 25.58 | 520.2897 | 4  | 521.2979 | 43.86 |
| 90  | FLLV                           | 26.29 | 490.3155 | 4  | 491.3231 | 34.85 |
| 91  | FLPL                           | 30.25 | 488.2998 | 4  | 489.3086 | 32.35 |
| 92  | FPF                            | 28.58 | 409.2001 | 3  | 410.2078 | 34.16 |
| 93  | FPI                            | 36.27 | 375.2158 | 3  | 376.2229 | 29.14 |
| 94  | FSR                            | 20.34 | 408.2121 | 3  | 409.2209 | 51.56 |
| 95  | FVQNIFVE                       | 35.04 | 994.5123 | 8  | 498.2637 | 36.44 |
| 96  | FVVI                           | 23.74 | 476.2999 | 4  | 477.3083 | 33    |
| 97  | GFFF                           | 39.14 | 516.2372 | 4  | 517.2446 | 48.13 |
| 98  | GFIL                           | 30.3  | 448.2686 | 4  | 449.2757 | 36.97 |
| 99  | GFLI                           | 30.3  | 448.2686 | 4  | 449.2757 | 36.97 |
| 100 | GGKAP                          | 26.93 | 428.2383 | 5  | 429.2484 | 38    |
| 101 | GGSIT                          | 30.65 | 433.2173 | 5  | 434.2203 | 44.62 |
| 102 | GGSLT                          | 30.65 | 433.2173 | 5  | 434.2203 | 44.62 |
| 103 | GIFI                           | 29.3  | 448.2686 | 4  | 449.2758 | 30.17 |
| 104 | GILI                           | 26.45 | 414.2842 | 4  | 415.2914 | 30.41 |
| 105 | GLFL                           | 29.3  | 448.2686 | 4  | 449.2758 | 30.17 |
| 106 | GLIL                           | 26.45 | 414.2842 | 4  | 415.2914 | 30.41 |
| 107 | GLLL                           | 26.45 | 414.2842 | 4  | 415.2914 | 30.41 |
| 108 | GMH                            | 21.68 | 343.1314 | 3  | 344.1398 | 47.08 |
| 109 | GPNKCLSCRITYK                  | 24.41 | 1368.664 | 12 | 457.2317 | 20.4  |
| 110 | GRV                            | 21.27 | 330.2015 | 3  | 331.2086 | 13.64 |
| 111 | GTGMSQVVNDDK                   | 25.44 | 1249.561 | 12 | 625.7894 | 47.68 |
| 112 | GWD                            | 23.03 | 376.1383 | 3  | 377.1451 | 23.62 |
| 113 | GYR                            | 20.96 | 394.1964 | 3  | 395.2015 | 52.56 |
| 114 | HEDLRQ                         | 20.57 | 796.3828 | 6  | 399.1965 | 25.12 |
| 115 | HHL                            | 21.68 | 405.2125 | 3  | 406.2222 | 38.68 |
| 116 | HLN                            | 24.93 | 382.1965 | 3  | 383.2058 | 39.7  |
| 117 | HPC                            | 20.04 | 355.1314 | 3  | 356.1402 | 47.08 |
| 118 | HYIF                           | 33.24 | 578.2853 | 4  | 579.2935 | 54.81 |
| 119 | IAQDFKTDLR                     | 71.5  | 1205.64  | 10 | 603.8282 | 21.64 |
| 120 | ICR                            | 29.07 | 390.2049 | 3  | 391.2104 | 51.74 |
| 121 | IDEYSVQQL-<br>K(+42.01)EYDGKTL | 20.82 | 2070.016 | 17 | 518.5093 | 27.69 |
| 122 | IDLDGDIVER                     | 56.68 | 1143.577 | 10 | 572.7954 | 27.95 |
| 123 | IDPPKERPIP                     | 62.51 | 1160.655 | 10 | 387.8922 | 20.7  |
| 124 | IEDTGIGMT                      | 20.05 | 935.427  | 9  | 936.4298 | 36.74 |

|     |                |       |          |    |          |       |
|-----|----------------|-------|----------|----|----------|-------|
| 125 | IFI            | 33.51 | 391.2471 | 3  | 392.2547 | 30.69 |
| 126 | IFII           | 30.8  | 504.3311 | 4  | 505.3384 | 39.63 |
| 127 | IFIP           | 33.83 | 488.2998 | 4  | 489.3083 | 32.91 |
| 128 | IFL            | 33.51 | 391.2471 | 3  | 392.2547 | 30.69 |
| 129 | IIA            | 29.4  | 315.2158 | 3  | 316.2225 | 47.91 |
| 130 | IIF            | 31.25 | 391.2471 | 3  | 392.2547 | 30.69 |
| 131 | IIL            | 26.15 | 357.2628 | 3  | 358.2697 | 41.82 |
| 132 | IILL           | 22.49 | 470.3468 | 4  | 471.3542 | 36.21 |
| 133 | IIS            | 23.66 | 331.2107 | 3  | 332.2195 | 52.65 |
| 134 | IITIP          | 23.79 | 555.3632 | 5  | 556.3708 | 31.2  |
| 135 | IIW            | 32.15 | 430.258  | 3  | 431.265  | 32.8  |
| 136 | IKR            | 26.59 | 415.2907 | 3  | 416.3007 | 47.8  |
| 137 | ILA            | 29.4  | 315.2158 | 3  | 316.2225 | 47.91 |
| 138 | ILDF           | 31.37 | 506.274  | 4  | 507.2822 | 31.35 |
| 139 | ILFL           | 30.49 | 504.3311 | 4  | 505.3391 | 39.02 |
| 140 | ILHIL          | 21.49 | 607.4057 | 5  | 304.7101 | 29.78 |
| 141 | ILL            | 26.15 | 357.2628 | 3  | 358.2697 | 41.82 |
| 142 | ILLL           | 22.49 | 470.3468 | 4  | 471.3542 | 36.21 |
| 143 | ILLV           | 27.42 | 456.3311 | 4  | 457.3383 | 29.89 |
| 144 | ILW            | 32.15 | 430.258  | 3  | 431.265  | 32.8  |
| 145 | INDGLKTIQI     | 20.85 | 1113.639 | 10 | 557.8272 | 27    |
| 146 | INFI           | 21.88 | 505.29   | 4  | 506.2983 | 33.97 |
| 147 | IPF            | 38.2  | 375.2158 | 3  | 376.2229 | 29.14 |
| 148 | IPLL           | 25.43 | 454.3155 | 4  | 455.3231 | 30.02 |
| 149 | IRI            | 23.07 | 400.2798 | 3  | 401.2873 | 53.49 |
| 150 | IRK            | 26.94 | 415.2907 | 3  | 416.3004 | 44.31 |
| 151 | IRKLPF         | 33.82 | 772.4959 | 6  | 258.5054 | 23.75 |
| 152 | IRKLPFQR       | 61.24 | 1056.656 | 8  | 353.2257 | 20.57 |
| 153 | IRKLPFQRL      | 29.54 | 1169.74  | 9  | 390.9195 | 24.28 |
| 154 | IRL            | 23.07 | 400.2798 | 3  | 401.2873 | 53.49 |
| 155 | ITAK           | 24.55 | 431.2744 | 4  | 432.2799 | 23.62 |
| 156 | ITIGG          | 31.13 | 459.2693 | 5  | 460.2751 | 41.35 |
| 157 | ITLGG          | 31.13 | 459.2693 | 5  | 460.2751 | 41.35 |
| 158 | ITPDKQ         | 22.65 | 700.3755 | 6  | 701.3872 | 51.26 |
| 159 | ITTSS          | 38.19 | 507.254  | 5  | 508.2574 | 43.76 |
| 160 | ITVQRI         | 25.12 | 728.4545 | 6  | 365.2349 | 26.16 |
| 161 | IWI            | 29.57 | 430.258  | 3  | 431.2658 | 35.54 |
| 162 | K(+43.01)ADNGP | 21.34 | 643.2925 | 6  | 644.2991 | 27.05 |
| 163 | KADNGPLKNLAYKR | 23.65 | 1586.889 | 14 | 397.727  | 22.07 |
| 164 | KAR            | 22.45 | 373.2437 | 3  | 374.2532 | 35.28 |
| 165 | KDMWAET        | 21.49 | 879.3796 | 7  | 440.697  | 27.51 |
| 166 | KE(+37.03)KYT  | 23.72 | 704.3857 | 5  | 705.3889 | 51.67 |
| 167 | KEYTINRQHKR    | 23.46 | 1471.801 | 11 | 491.6089 | 23.37 |
| 168 | KFFI           | 23.87 | 553.3264 | 4  | 554.3347 | 33.19 |

|     |                 |       |           |    |          |       |
|-----|-----------------|-------|-----------|----|----------|-------|
| 169 | KFL             | 33.01 | 406.258   | 3  | 407.2645 | 33.19 |
| 170 | KILW            | 22.66 | 558.353   | 4  | 559.3619 | 34.12 |
| 171 | KIR             | 26.98 | 415.2907  | 3  | 416.3004 | 44.31 |
| 172 | KLLV            | 28.7  | 471.342   | 4  | 472.3474 | 41.38 |
| 173 | KLPFQRL         | 35.86 | 900.5545  | 7  | 301.1923 | 25.68 |
| 174 | KLVL            | 23.69 | 471.342   | 4  | 472.3474 | 41.38 |
| 175 | KMR             | 21.71 | 433.2471  | 3  | 434.2539 | 42.88 |
| 176 | KQLA            | 23.11 | 458.2853  | 4  | 459.2909 | 53.47 |
| 177 | KRA             | 24.41 | 373.2437  | 3  | 374.2532 | 34.83 |
| 178 | KRC             | 22.35 | 405.2158  | 3  | 406.2222 | 38.68 |
| 179 | KRI             | 30.27 | 415.2907  | 3  | 416.3003 | 36.33 |
| 180 | KRP             | 25.3  | 399.2594  | 3  | 400.269  | 39.07 |
| 181 | KRT             | 28.33 | 403.2543  | 3  | 404.2641 | 48.83 |
| 182 | KVI             | 24.98 | 358.258   | 3  | 359.2649 | 38.92 |
| 183 | KVL             | 24.98 | 358.258   | 3  | 359.2649 | 38.92 |
| 184 | KVVDN(+203.08)R | 21.48 | 932.4927  | 6  | 467.256  | 26.61 |
| 185 | KVYLP           | 24.94 | 490.2791  | 4  | 491.2832 | 50.76 |
| 186 | KWI             | 28.81 | 445.2689  | 3  | 446.2763 | 34.12 |
| 187 | KYL             | 23.63 | 422.2529  | 3  | 423.2593 | 48.57 |
| 188 | KYR             | 27.29 | 465.27    | 3  | 466.279  | 43.39 |
| 189 | L(+71.04)GLGI   | 24.09 | 542.3428  | 5  | 543.3499 | 32.22 |
| 190 | LAGG            | 40.84 | 316.1747  | 4  | 317.1821 | 34.12 |
| 191 | LCR             | 29.07 | 390.2049  | 3  | 391.2104 | 51.74 |
| 192 | LDFL            | 29.49 | 506.274   | 4  | 507.2814 | 37.25 |
| 193 | LDGGDVINSL      | 32.49 | 1001.503  | 10 | 1002.51  | 34.33 |
| 194 | LDIL            | 33.45 | 472.2897  | 4  | 473.297  | 31.63 |
| 195 | LDPL            | 29.21 | 456.2584  | 4  | 457.2652 | 27.78 |
| 196 | LELP            | 28.92 | 470.274   | 4  | 471.2804 | 28.46 |
| 197 | LFI             | 33.51 | 391.2471  | 3  | 392.2547 | 30.69 |
| 198 | LFIP            | 33.83 | 488.2998  | 4  | 489.3083 | 32.91 |
| 199 | LFIPRRAPFD      | 26.48 | 1230.687  | 10 | 411.2365 | 29.52 |
| 200 | LFL             | 33.51 | 391.2471  | 3  | 392.2547 | 30.69 |
| 201 | LGFI            | 29.06 | 448.2686  | 4  | 449.2761 | 34.27 |
| 202 | LGLF            | 27.81 | 448.2686  | 4  | 449.2758 | 30.17 |
| 203 | LGLGI           | 27.03 | 471.3057  | 5  | 472.3133 | 33.73 |
| 204 | LGPF            | 34.44 | 432.2372  | 4  | 433.2448 | 29.05 |
| 205 | LGVII           | 20.64 | 513.3526  | 5  | 514.3601 | 35.9  |
| 206 | LIDV            | 20.8  | 458.274   | 4  | 459.2805 | 24.82 |
| 207 | LIF             | 31.25 | 391.2471  | 3  | 392.2547 | 30.69 |
| 208 | LII             | 26.15 | 357.2628  | 3  | 358.2697 | 41.82 |
| 209 | LIL             | 26.15 | 357.2628  | 3  | 358.2697 | 41.82 |
| 210 | LIRKLPF         | 40.65 | 885.58    | 7  | 296.2002 | 26.89 |
| 211 | LIRKLPFQ        | 46.34 | 1013.6385 | 8  | 507.8271 | 25.93 |
| 212 | LIRKLPFQR       | 59.63 | 1169.7396 | 9  | 390.92   | 23.06 |

|     |                     |       |           |    |          |       |
|-----|---------------------|-------|-----------|----|----------|-------|
| 213 | LIRKLPFQRL          | 37.7  | 1282.8237 | 10 | 428.6153 | 26.75 |
| 214 | LIS                 | 23.66 | 331.2107  | 3  | 332.2195 | 52.65 |
| 215 | LKR                 | 26.59 | 415.2907  | 3  | 416.3007 | 47.8  |
| 216 | LLF                 | 31.25 | 391.2471  | 3  | 392.2547 | 30.69 |
| 217 | LLFD                | 33.34 | 506.274   | 4  | 507.2811 | 28.15 |
| 218 | LLFI                | 30.49 | 504.3311  | 4  | 505.3391 | 39.02 |
| 219 | LLFIP               | 28.42 | 601.3839  | 5  | 602.3909 | 42.87 |
| 220 | LLFP                | 31.28 | 488.2998  | 4  | 489.308  | 33.58 |
| 221 | LLGAL               | 21.61 | 485.3213  | 5  | 486.3289 | 28.7  |
| 222 | LLGF                | 25.25 | 448.2686  | 4  | 449.2758 | 30.17 |
| 223 | LLHIL               | 21.49 | 607.4057  | 5  | 304.7101 | 29.78 |
| 224 | LLI                 | 26.15 | 357.2628  | 3  | 358.2697 | 41.82 |
| 225 | LLIRKLPFQR          | 40.37 | 1282.8237 | 10 | 428.6147 | 27.82 |
| 226 | LLL                 | 26.15 | 357.2628  | 3  | 358.2697 | 41.82 |
| 227 | LLLP                | 27.41 | 454.3155  | 4  | 455.3231 | 30.02 |
| 228 | LLLV                | 27.42 | 456.3311  | 4  | 457.3383 | 29.89 |
| 229 | LLPLI               | 20.22 | 567.3995  | 5  | 568.4067 | 39.83 |
| 230 | LLPLL               | 20.22 | 567.3995  | 5  | 568.4067 | 39.83 |
| 231 | LLS                 | 23.66 | 331.2107  | 3  | 332.2195 | 52.65 |
| 232 | LLSSGFT(-18.01)LEEP | 22.58 | 1173.5917 | 11 | 587.7991 | 36.09 |
| 233 | LLVF                | 26.15 | 490.3155  | 4  | 491.3228 | 35.56 |
| 234 | LLVI                | 23.51 | 456.3311  | 4  | 457.3389 | 31.17 |
| 235 | LLW                 | 32.15 | 430.258   | 3  | 431.265  | 32.8  |
| 236 | LMF                 | 29.66 | 409.2035  | 3  | 410.2103 | 40.65 |
| 237 | LNFL                | 21.88 | 505.29    | 4  | 506.2983 | 33.97 |
| 238 | LPF                 | 38.2  | 375.2158  | 3  | 376.2229 | 29.14 |
| 239 | LPFQRL              | 44.03 | 772.4595  | 6  | 387.2367 | 28.51 |
| 240 | LPLI                | 25.43 | 454.3155  | 4  | 455.3231 | 30.02 |
| 241 | LRK                 | 26.94 | 415.2907  | 3  | 416.3004 | 44.31 |
| 242 | LRK                 | 26.94 | 415.2907  | 3  | 416.3004 | 44.31 |
| 243 | LTAK                | 24.55 | 431.2744  | 4  | 432.2799 | 23.62 |
| 244 | LTGKDFPVEEPVDVST    | 24.22 | 1731.8567 | 16 | 578.2957 | 32.22 |
| 245 | LTIGG               | 31.13 | 459.2693  | 5  | 460.2751 | 41.35 |
| 246 | LTLGG               | 31.13 | 459.2693  | 5  | 460.2751 | 41.35 |
| 247 | LTPL                | 28.84 | 442.2791  | 4  | 443.2865 | 27.91 |
| 248 | LTRDDANYGVPL        | 21.28 | 1332.6674 | 12 | 667.3411 | 28.24 |
| 249 | LTSS                | 38.19 | 507.254   | 5  | 508.2574 | 43.76 |
| 250 | LVFDVPMP            | 22.2  | 916.4728  | 8  | 459.2455 | 22.07 |
| 251 | LVGLF               | 22.62 | 547.337   | 5  | 548.3441 | 38.15 |
| 252 | LVIF                | 27.21 | 490.3155  | 4  | 491.3228 | 35.56 |
| 253 | LVLV                | 27.21 | 490.3155  | 4  | 491.3228 | 35.56 |
| 254 | LVLV                | 29.08 | 440.2999  | 4  | 441.3068 | 28.13 |
| 255 | LVNN(+.98)L         | 23.82 | 572.317   | 5  | 573.3242 | 30.22 |
| 256 | LVREIAQDF           | 76.42 | 1089.5818 | 9  | 545.7983 | 29.28 |

|     |                            |       |           |    |           |       |
|-----|----------------------------|-------|-----------|----|-----------|-------|
| 257 | MNQ                        | 23.65 | 391.1526  | 3  | 392.1604  | 34.25 |
| 258 | MRCRAY                     | 21.75 | 798.3629  | 6  | 799.3657  | 47.26 |
| 259 | MTR                        | 22.09 | 406.1998  | 3  | 407.2046  | 50.39 |
| 260 | NEDDFLPPV                  | 65.22 | 1044.4763 | 9  | 1045.4844 | 36.53 |
| 261 | NEFPDPVK                   | 21.51 | 944.4603  | 8  | 473.2371  | 23.39 |
| 262 | NHI                        | 29.3  | 382.1965  | 3  | 383.2058  | 39.7  |
| 263 | NST                        | 28.79 | 320.1332  | 3  | 321.1407  | 40.79 |
| 264 | NSVAA                      | 36.37 | 460.2281  | 5  | 461.2316  | 34.81 |
| 265 | NYS                        | 31.37 | 382.1488  | 3  | 383.1561  | 49.2  |
| 266 | NYT                        | 20.34 | 396.1645  | 3  | 397.1718  | 50.09 |
| 267 | PAD                        | 22.5  | 301.1274  | 3  | 302.1345  | 48.41 |
| 268 | PAE                        | 28.32 | 315.143   | 3  | 316.1514  | 45.38 |
| 269 | PAS                        | 24.23 | 273.1324  | 3  | 274.1393  | 7.59  |
| 270 | PAT                        | 21.19 | 287.1481  | 3  | 288.1545  | 48.97 |
| 271 | PDPDLP                     | 29.44 | 652.3068  | 6  | 653.312   | 38.43 |
| 272 | PER                        | 21.89 | 400.207   | 3  | 401.214   | 56.95 |
| 273 | PGHP                       | 27.96 | 406.1964  | 4  | 407.2048  | 46.04 |
| 274 | PISSYVEPP                  | 20.9  | 987.4913  | 9  | 494.7533  | 30.82 |
| 275 | PLKN(+.98)LAYKR(+14.02)ETY | 23.28 | 1509.8191 | 12 | 755.9219  | 37.14 |
| 276 | PPSVPP                     | 21.8  | 592.322   | 6  | 593.3292  | 26.29 |
| 277 | PRK                        | 25.73 | 399.2594  | 3  | 400.2691  | 40.59 |
| 278 | PRPP                       | 23.36 | 465.2699  | 4  | 466.279   | 43.39 |
| 279 | PSKLDSGK(+54.01)DL         | 22.19 | 1112.5713 | 10 | 1113.5784 | 33.62 |
| 280 | PTT                        | 34.36 | 317.1587  | 3  | 318.1675  | 46.66 |
| 281 | PYGPL                      | 27.62 | 545.2849  | 5  | 546.2919  | 26.19 |
| 282 | Q(-17.03)FIG               | 20.32 | 446.2165  | 4  | 447.2234  | 39.47 |
| 283 | QAA                        | 26.97 | 288.1434  | 3  | 289.1513  | 44.38 |
| 284 | QC(+31.99)P                | 21.2  | 378.1209  | 3  | 379.1292  | 42.54 |
| 285 | QHF                        | 22.48 | 430.1965  | 3  | 431.2042  | 42.67 |
| 286 | QHP                        | 22.3  | 380.1808  | 3  | 381.1884  | 46.49 |
| 287 | QIND                       | 20.06 | 488.2231  | 4  | 489.2299  | 7.6   |
| 288 | QKPDNFASTKT                | 20.96 | 1348.699  | 12 | 675.3525  | 46.79 |
| 289 | QLLF                       | 21.23 | 519.3057  | 4  | 520.3126  | 33.56 |
| 290 | QLND                       | 20.06 | 488.2231  | 4  | 489.2299  | 7.6   |
| 291 | QQY                        | 21.98 | 437.191   | 3  | 438.1977  | 55.59 |
| 292 | QRI                        | 28.36 | 415.2543  | 3  | 416.2638  | 36.38 |
| 293 | QRL                        | 28.36 | 415.2543  | 3  | 416.2638  | 36.38 |
| 294 | QRV                        | 25.9  | 401.2386  | 3  | 402.2486  | 51.58 |
| 295 | R(+14.02)ANNRPPQG          | 21.84 | 1022.537  | 9  | 1023.547  | 27.47 |
| 296 | RCE                        | 34.36 | 406.1635  | 3  | 407.1731  | 48.55 |
| 297 | RCI                        | 21.46 | 390.2049  | 3  | 391.2098  | 42.95 |
| 298 | RCL                        | 21.46 | 390.2049  | 3  | 391.2098  | 42.95 |
| 299 | RDPENFPF                   | 31.6  | 1020.466  | 8  | 511.2408  | 31.7  |
| 300 | RFA                        | 29.13 | 392.2172  | 3  | 393.2265  | 39.61 |

|     |                      |       |          |    |          |       |
|-----|----------------------|-------|----------|----|----------|-------|
| 301 | RFP                  | 26.15 | 418.2328 | 3  | 419.2404 | 50.82 |
| 302 | RGM                  | 21.11 | 362.1736 | 3  | 363.1801 | 41.13 |
| 303 | RGVP                 | 25.98 | 427.2543 | 4  | 428.2638 | 37.86 |
| 304 | RHS                  | 21.59 | 398.2026 | 3  | 399.2114 | 55.13 |
| 305 | RLFGSPYGSMWDDPWARDFF | 20.07 | 2449.095 | 20 | 613.281  | 14.83 |
| 306 | RMT                  | 29.19 | 406.1998 | 3  | 407.2046 | 50.39 |
| 307 | RPK                  | 28.89 | 399.2594 | 3  | 400.2691 | 40.59 |
| 308 | RPP                  | 22.34 | 368.2172 | 3  | 369.225  | 37.59 |
| 309 | RPV                  | 24.33 | 370.2328 | 3  | 371.2401 | 53.22 |
| 310 | RQI                  | 24.33 | 415.2543 | 3  | 416.264  | 35.07 |
| 311 | RQL                  | 24.33 | 415.2543 | 3  | 416.264  | 35.07 |
| 312 | RSGSYT               | 24.9  | 669.3082 | 6  | 670.312  | 41.42 |
| 313 | RTK                  | 22.15 | 403.2543 | 3  | 404.2639 | 51.52 |
| 314 | RWL                  | 26.51 | 473.275  | 3  | 474.2845 | 38.82 |
| 315 | SDD                  | 22.2  | 335.0965 | 3  | 336.1019 | 6.19  |
| 316 | SDE                  | 26.76 | 349.1121 | 3  | 350.1171 | 11.51 |
| 317 | SFR                  | 23.44 | 408.2121 | 3  | 409.22   | 39.7  |
| 318 | SGT                  | 35.66 | 263.1117 | 3  | 264.1197 | 45.61 |
| 319 | SGTAV                | 37.02 | 433.2173 | 5  | 434.2209 | 39.19 |
| 320 | SILHIL               | 24.95 | 694.4377 | 6  | 348.2259 | 33.38 |
| 321 | SLI                  | 23.45 | 331.2107 | 3  | 332.2195 | 52.65 |
| 322 | SL LHIL              | 24.95 | 694.4377 | 6  | 348.2259 | 33.38 |
| 323 | SLLS(+162.05)SGF     | 29.58 | 871.4174 | 7  | 436.7169 | 29.45 |
| 324 | SPI                  | 32.53 | 315.1794 | 3  | 316.1861 | 39.59 |
| 325 | SPSSS                | 35.4  | 463.1914 | 5  | 464.1944 | 43.7  |
| 326 | SSH                  | 22.32 | 329.1335 | 3  | 330.1403 | 9.07  |
| 327 | SST                  | 22.38 | 293.1223 | 3  | 294.1305 | 52.82 |
| 328 | STQ                  | 27.7  | 334.1489 | 3  | 335.156  | 45.61 |
| 329 | SVEGQLEFR            | 41.33 | 1063.53  | 9  | 532.772  | 25.54 |
| 330 | SWRDEF               | 25.42 | 838.361  | 6  | 420.1876 | 27.91 |
| 331 | T(+27.99)LDDKDPL     | 21.05 | 943.4498 | 8  | 472.7317 | 29.77 |
| 332 | TCK                  | 25.7  | 350.1624 | 3  | 351.1699 | 43.65 |
| 333 | TELTETQQ             | 29.73 | 948.44   | 8  | 475.2299 | 24.51 |
| 334 | TFIF                 | 25.15 | 526.2791 | 4  | 527.2871 | 40.14 |
| 335 | TFLF                 | 25.15 | 526.2791 | 4  | 527.2871 | 40.14 |
| 336 | TGIFIICH             | 39.57 | 902.4684 | 8  | 903.4771 | 27.8  |
| 337 | TGPSYEVK             | 21.37 | 879.4338 | 8  | 880.4432 | 25.21 |
| 338 | TGVAS                | 35.71 | 433.2173 | 5  | 434.2206 | 46.92 |
| 339 | TGVDV                | 24.19 | 489.2435 | 5  | 490.2477 | 41.32 |
| 340 | TIGGVL               | 25.07 | 558.3377 | 6  | 559.3446 | 30.62 |
| 341 | TIGGVLL              | 26.83 | 671.4218 | 7  | 672.4288 | 31.54 |
| 342 | TIILL                | 23.99 | 571.3945 | 5  | 572.4019 | 38.54 |
| 343 | TIYGGVGS LP          | 22.29 | 962.5073 | 10 | 482.261  | 24.68 |
| 344 | TK(+42.01)VIGIDLD    | 24.16 | 1014.56  | 9  | 508.2873 | 25.46 |



|     |                                     |       |          |    |          |       |
|-----|-------------------------------------|-------|----------|----|----------|-------|
| 345 | TLDDK(+226.08)DPL                   | 22.96 | 1141.533 | 8  | 571.7704 | 36.67 |
| 346 | TLDDKDPL                            | 32.22 | 915.4549 | 8  | 458.7354 | 38.56 |
| 347 | TLGLF                               | 20.47 | 549.3162 | 5  | 550.3232 | 39.21 |
| 348 | TLHLKEDQVE                          | 22.17 | 1210.619 | 10 | 606.3128 | 32.3  |
| 349 | TLKEWNNIIFP                         | 21.5  | 1373.734 | 11 | 458.921  | 32    |
| 350 | TLPW                                | 27.68 | 515.2744 | 4  | 516.2805 | 28.77 |
| 351 | TLQDRSIFNF                          | 32.3  | 1239.625 | 10 | 620.8207 | 29.21 |
| 352 | TLSGSPQ                             | 21.82 | 688.3392 | 7  | 689.3485 | 29.65 |
| 353 | TLVML                               | 20.03 | 575.3353 | 5  | 576.3386 | 31.26 |
| 354 | TPDSRCCNIP                          | 24.63 | 1104.469 | 10 | 553.2386 | 31.49 |
| 355 | TPLLTL                              | 27.12 | 656.4109 | 6  | 657.4183 | 36.05 |
| 356 | TPVSS                               | 24.94 | 489.2435 | 5  | 490.2477 | 41.32 |
| 357 | TRK                                 | 20.85 | 403.2543 | 3  | 404.264  | 38.31 |
| 358 | TRQYMLP                             | 20.56 | 907.4586 | 7  | 454.7349 | 27.27 |
| 359 | TTFATSGKAVDGISNS-<br>QWVAGSCASTHSEQ | 25.83 | 3026.368 | 30 | 606.2826 | 20.47 |
| 360 | TTQ                                 | 32.67 | 348.1645 | 3  | 349.1714 | 49.02 |
| 321 | SLI                                 | 23.45 | 331.2107 | 3  | 332.2195 | 52.65 |
| 322 | SLLHIL                              | 24.95 | 694.4377 | 6  | 348.2259 | 33.38 |
| 323 | SLLS(+162.05)SGF                    | 29.58 | 871.4174 | 7  | 436.7169 | 29.45 |
| 324 | SPI                                 | 32.53 | 315.1794 | 3  | 316.1861 | 39.59 |
| 325 | SPSSS                               | 35.4  | 463.1914 | 5  | 464.1944 | 43.7  |
| 326 | SSH                                 | 22.32 | 329.1335 | 3  | 330.1403 | 9.07  |
| 327 | SST                                 | 22.38 | 293.1223 | 3  | 294.1305 | 52.82 |
| 328 | STQ                                 | 27.7  | 334.1489 | 3  | 335.156  | 45.61 |
| 329 | SVEGQLEFR                           | 41.33 | 1063.53  | 9  | 532.772  | 25.54 |
| 330 | SWRDEF                              | 25.42 | 838.361  | 6  | 420.1876 | 27.91 |
| 331 | T(+27.99)LDDKDPL                    | 21.05 | 943.4498 | 8  | 472.7317 | 29.77 |
| 332 | TCK                                 | 25.7  | 350.1624 | 3  | 351.1699 | 43.65 |
| 333 | TELTETQQ                            | 29.73 | 948.44   | 8  | 475.2299 | 24.51 |
| 334 | TFIF                                | 25.15 | 526.2791 | 4  | 527.2871 | 40.14 |
| 335 | TFLF                                | 25.15 | 526.2791 | 4  | 527.2871 | 40.14 |
| 336 | TGIFIICH                            | 39.57 | 902.4684 | 8  | 903.4771 | 27.8  |
| 337 | TGPSYEVK                            | 21.37 | 879.4338 | 8  | 880.4432 | 25.21 |
| 338 | TGVAS                               | 35.71 | 433.2173 | 5  | 434.2206 | 46.92 |
| 339 | TGVDV                               | 24.19 | 489.2435 | 5  | 490.2477 | 41.32 |
| 340 | TIGGVL                              | 25.07 | 558.3377 | 6  | 559.3446 | 30.62 |
| 341 | TIGGVLL                             | 26.83 | 671.4218 | 7  | 672.4288 | 31.54 |
| 342 | THILL                               | 23.99 | 571.3945 | 5  | 572.4019 | 38.54 |
| 343 | TIYGGVGSPL                          | 22.29 | 962.5073 | 10 | 482.261  | 24.68 |
| 344 | TK(+42.01)VIGIDLD                   | 24.16 | 1014.56  | 9  | 508.2873 | 25.46 |
| 345 | TLDDK(+226.08)DPL                   | 22.96 | 1141.533 | 8  | 571.7704 | 36.67 |
| 346 | TLDDKDPL                            | 32.22 | 915.4549 | 8  | 458.7354 | 38.56 |
| 347 | TLGLF                               | 20.47 | 549.3162 | 5  | 550.3232 | 39.21 |

|     |                                     |       |          |    |          |       |
|-----|-------------------------------------|-------|----------|----|----------|-------|
| 348 | TLHLKEDQVE                          | 22.17 | 1210.619 | 10 | 606.3128 | 32.3  |
| 349 | TLKEWNNIIFP                         | 21.5  | 1373.734 | 11 | 458.921  | 32    |
| 350 | TLPW                                | 27.68 | 515.2744 | 4  | 516.2805 | 28.77 |
| 351 | TLQDRSIFNF                          | 32.3  | 1239.625 | 10 | 620.8207 | 29.21 |
| 352 | TLSGSPQ                             | 21.82 | 688.3392 | 7  | 689.3485 | 29.65 |
| 353 | TLVML                               | 20.03 | 575.3353 | 5  | 576.3386 | 31.26 |
| 354 | TPDSRCCNIP                          | 24.63 | 1104.469 | 10 | 553.2386 | 31.49 |
| 355 | TPLLTL                              | 27.12 | 656.4109 | 6  | 657.4183 | 36.05 |
| 356 | TPVSS                               | 24.94 | 489.2435 | 5  | 490.2477 | 41.32 |
| 357 | TRK                                 | 20.85 | 403.2543 | 3  | 404.264  | 38.31 |
| 358 | TRQYMLP                             | 20.56 | 907.4586 | 7  | 454.7349 | 27.27 |
| 359 | TTFATSGKAVDGISNS-<br>QWVAGSCASTHSEQ | 25.83 | 3026.368 | 30 | 606.2826 | 20.47 |
| 360 | TTQ                                 | 32.67 | 348.1645 | 3  | 349.1714 | 49.02 |
| 361 | TVAGHD(+43.99)KR                    | 20.11 | 926.457  | 8  | 464.2357 | 17.47 |
| 362 | TVAGHDKRFD-<br>AVC(+58.01)GTFSGP    | 20.39 | 2021.927 | 19 | 506.4873 | 19.02 |
| 363 | TVI                                 | 28.38 | 331.2107 | 3  | 332.2195 | 52.65 |
| 364 | TVII                                | 39.51 | 444.2948 | 4  | 445.3019 | 33.17 |
| 365 | TVIL                                | 39.51 | 444.2948 | 4  | 445.3019 | 33.17 |
| 366 | TVK                                 | 31.68 | 346.2216 | 3  | 347.2307 | 47.49 |
| 367 | TVL                                 | 28.38 | 331.2107 | 3  | 332.2195 | 52.65 |
| 368 | TVLL                                | 39.51 | 444.2948 | 4  | 445.3019 | 33.17 |
| 369 | TVLLL                               | 27.39 | 557.3788 | 5  | 558.3862 | 37.14 |
| 370 | TYDLIS(+164.06)N                    | 23.71 | 988.4518 | 7  | 989.4581 | 30.02 |
| 371 | TYDLIS(+164.06)NLT                  | 24.39 | 1202.584 | 9  | 602.2985 | 32.67 |
| 372 | VGLF                                | 33.62 | 434.2529 | 4  | 435.2604 | 31.37 |
| 373 | VGLFE                               | 21.2  | 563.2955 | 5  | 564.3026 | 33.28 |
| 374 | VIFP                                | 24.68 | 474.2842 | 4  | 475.2915 | 31.2  |
| 375 | VIGIDL                              | 24.03 | 628.3796 | 6  | 629.3867 | 35.61 |
| 376 | VIII                                | 29.26 | 456.3311 | 4  | 457.3384 | 33.97 |
| 377 | VLLL                                | 29.26 | 456.3311 | 4  | 457.3384 | 33.97 |
| 378 | VNTA                                | 25.68 | 403.2067 | 4  | 404.2127 | 58.71 |
| 379 | VPR                                 | 23.49 | 370.2328 | 3  | 371.2401 | 53.22 |
| 380 | VQLL                                | 21.68 | 471.3057 | 4  | 472.3129 | 31.43 |
| 381 | VRP                                 | 24.83 | 370.2328 | 3  | 371.2404 | 39.6  |
| 382 | VSLF                                | 22.36 | 464.2635 | 4  | 465.271  | 30.63 |
| 383 | VVA                                 | 26.48 | 287.1845 | 3  | 288.1927 | 42.49 |
| 384 | VVCH                                | 41.8  | 456.2155 | 4  | 457.2208 | 50.84 |
| 385 | VVDSEDLP                            | 29.4  | 872.4127 | 8  | 873.4199 | 24.97 |
| 386 | VVV                                 | 31.27 | 315.2158 | 3  | 316.2243 | 52.92 |
| 387 | VYDTLDP                             | 25.41 | 821.3807 | 7  | 822.3874 | 34.79 |
| 388 | VYIP                                | 24.94 | 490.2791 | 4  | 491.2832 | 50.76 |
| 389 | WALMNYEAV                           | 23.42 | 1095.506 | 9  | 1096.512 | 39.2  |

|     |                |       |          |    |          |       |
|-----|----------------|-------|----------|----|----------|-------|
| 390 | WDDPW(+15.99)A | 22.33 | 804.3079 | 6  | 805.3147 | 35.09 |
| 391 | WLKYAS         | 20.39 | 766.4014 | 6  | 384.2075 | 39.28 |
| 392 | WLL            | 30.63 | 430.258  | 3  | 431.2659 | 37.76 |
| 393 | WPF            | 40.38 | 448.211  | 3  | 449.2182 | 37.86 |
| 394 | WVGEQM         | 28.51 | 748.3214 | 6  | 749.3282 | 29.76 |
| 395 | WYV            | 21.01 | 466.2216 | 3  | 467.2291 | 36.05 |
| 396 | YCT            | 20.64 | 385.1308 | 3  | 386.1384 | 38.84 |
| 397 | YFI            | 31.35 | 441.2263 | 3  | 442.2338 | 31.24 |
| 398 | YGS            | 22.38 | 325.1274 | 3  | 326.1338 | 45.49 |
| 399 | YII            | 22.68 | 407.242  | 3  | 408.2492 | 52.09 |
| 400 | YLL            | 22.68 | 407.242  | 3  | 408.2492 | 52.09 |
| 401 | YLVGL          | 31.47 | 563.3319 | 5  | 564.3394 | 33.73 |
| 402 | YQKSTELLIR     | 52.42 | 1249.703 | 10 | 417.5753 | 22.11 |
| 403 | YRP            | 26.37 | 434.2278 | 3  | 435.2352 | 39.66 |
| 404 | YVLI           | 27.8  | 506.3104 | 4  | 507.3185 | 33.04 |

---
