# Supplementary material for: Rapid screening of novel tyrosinase inhibitory peptides from a pearl shell meat hydrolysate by molecular docking and the anti-melanin mechanism
Source: Royal Society of Chemistry journal article supplement (doi:10.1039/d2fo03105a), 2022-12-23
Supplement: d2fo03105a2.pdf [file d2fo03105a2.pdf]

**Supplementary material of raw data including qRT-PCR and Western blot**

**qRT-PCR**

**1. RNA electropherogram in qRT-PCR (Figure 4. A1)**

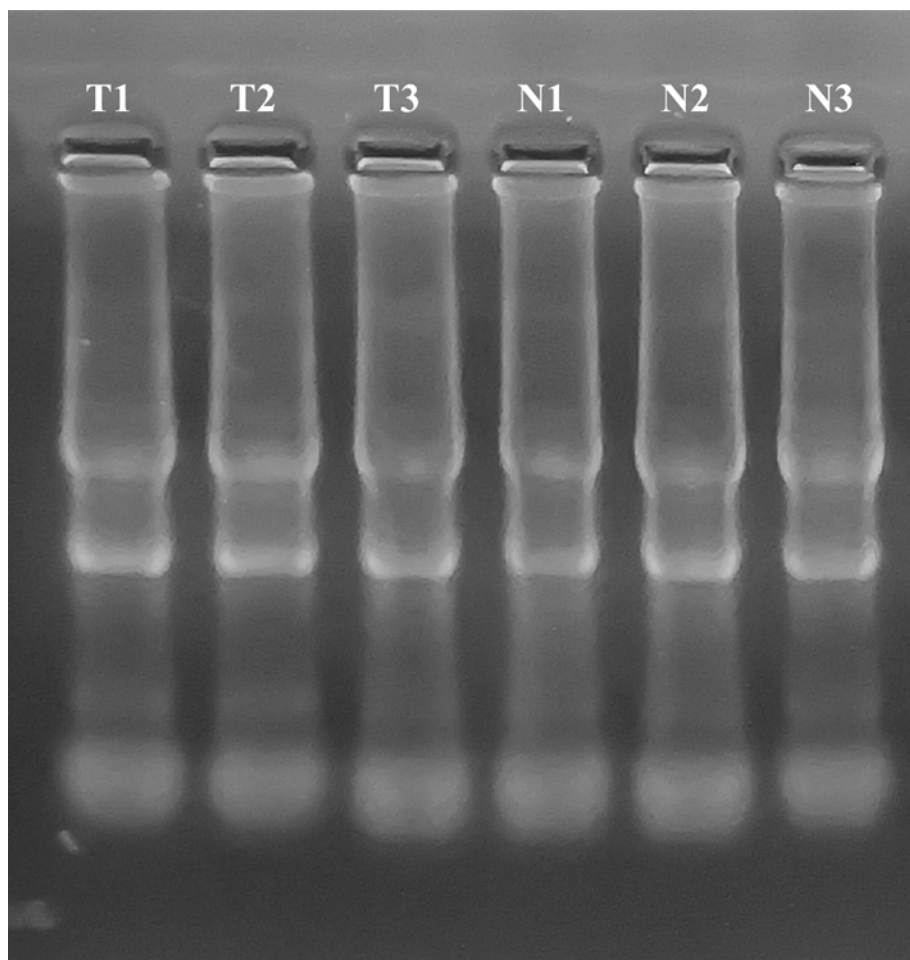

**the control group (N1, N2, N3)**

**the FLF group (T1, T2, T3)**

## 2. Primer information in qRT-PCR

| Primer                 | Sequence (5'-3')                              | Product (bp) |
|------------------------|-----------------------------------------------|--------------|
| Mitf-F2<br>Mitf-R2     | ACAGCAACGAGCTAAGGACC<br>CTCTAGCCTGCATCTCCAGC  | 101          |
| Tyr-F1<br>Tyr-R1       | TCCTTCTTCTCCTCCTGGCA<br>TGGGGGTTTTGGCTTTGTCA  | 133          |
| Trpc1-F1<br>Trpc1-R1   | TTCATTGGCACCTGCTTTGC<br>TCACAGCTCCAACGAAGGAC  | 115          |
| Trpc2-F1<br>Trpc2-R1   | TGGTGGACATGCCTCAGTTC<br>CAGGTAGAGCTTGGAGCGAG  | 182          |
| Mc1r-F1<br>Mc1r-R1     | AATGCCACCTCTCACCTTGG<br>ACCAGCACATTCTCCACCAG  | 122          |
| Creb1-F1<br>Creb1-R1   | TGCACAGACCACTGATGGAC<br>GACCTCTCTCTTCCGTGCTG  | 193          |
| Wnt4-F2<br>Wnt4-R2     | CCACGCGCTAAAGGAGAAGT<br>GTCCTGCTCACAGAAGTCCG  | 157          |
| Mapk8-F1<br>Mapk8-R1   | CAAGCACCTTCACTCTGCTG<br>AGTCCTCGCCAGTCCAAAATC | 109          |
| Mapk1-F2<br>Mapk1-R2   | ACCTCATGGAGACGGACCTT<br>TGGTGTTTCAGCAGGAGGTTG | 162          |
| Ctnnb1-F1<br>Ctnnb1-R1 | GAGCACATCAGGACACCCAA<br>CCGAGCAAGGATGTGGAGAG  | 122          |
| mGAPDH-F1<br>mGAPDH-R1 | ATGTGTCCGTCGTGGATCTG<br>AAGTCGCAGGAGACAACCTG  | 142          |

### 3. Amplification plot in qRT-PCR

#### Amplification Plot

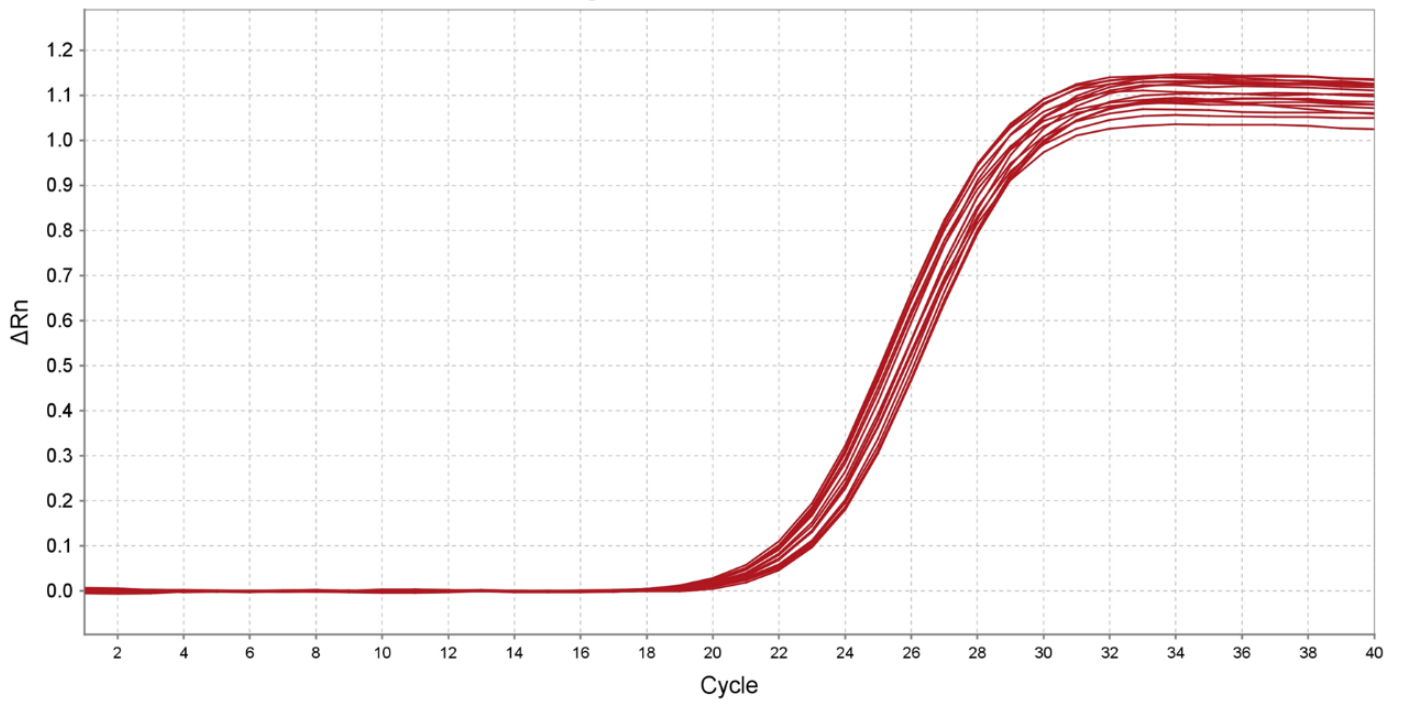

#### Amplification plot of MITF

#### Amplification Plot

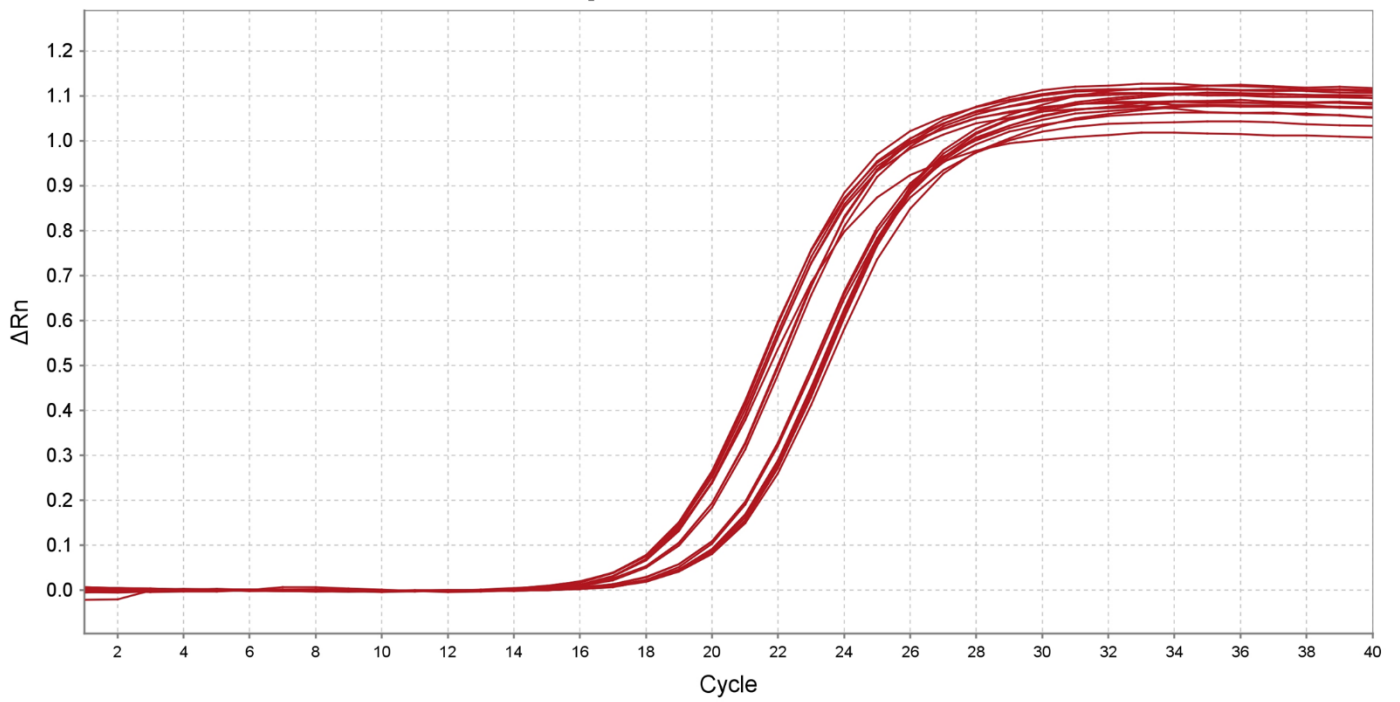

#### Amplification plot of TYR

**Amplification Plot**

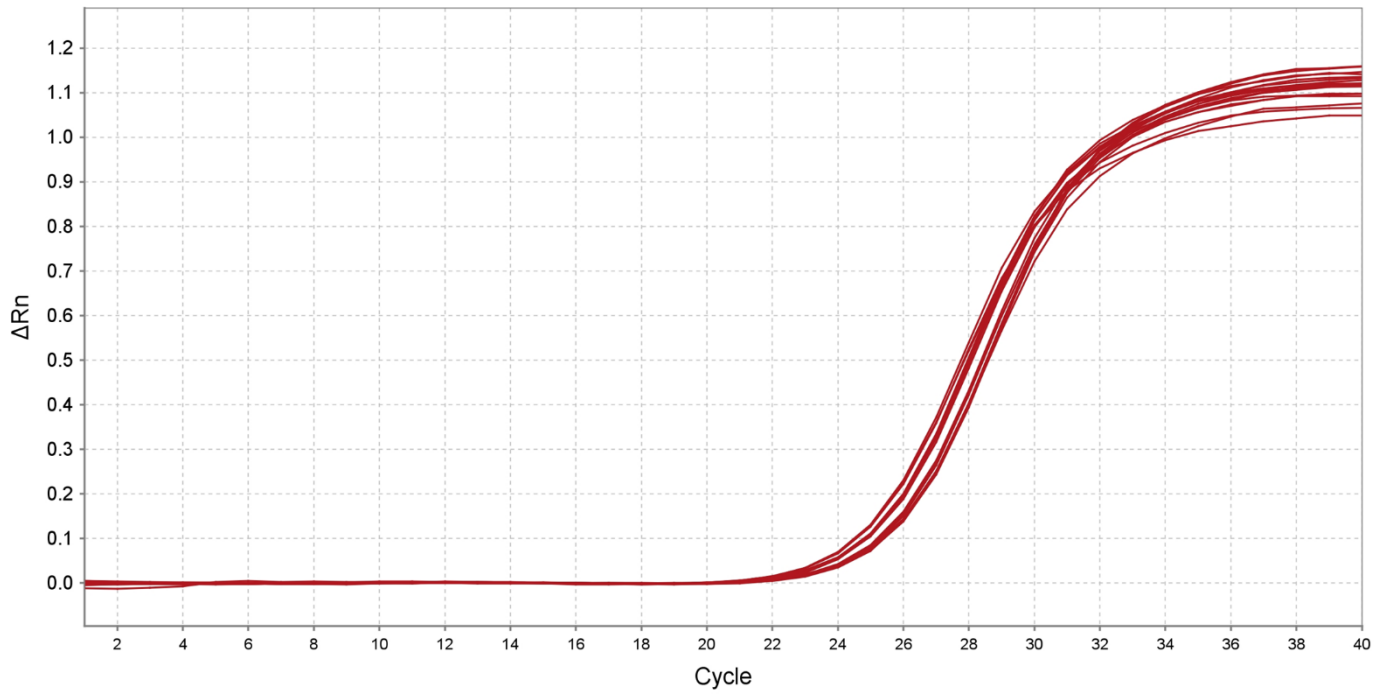

**Amplification plot of TRP1**

**Amplification Plot**

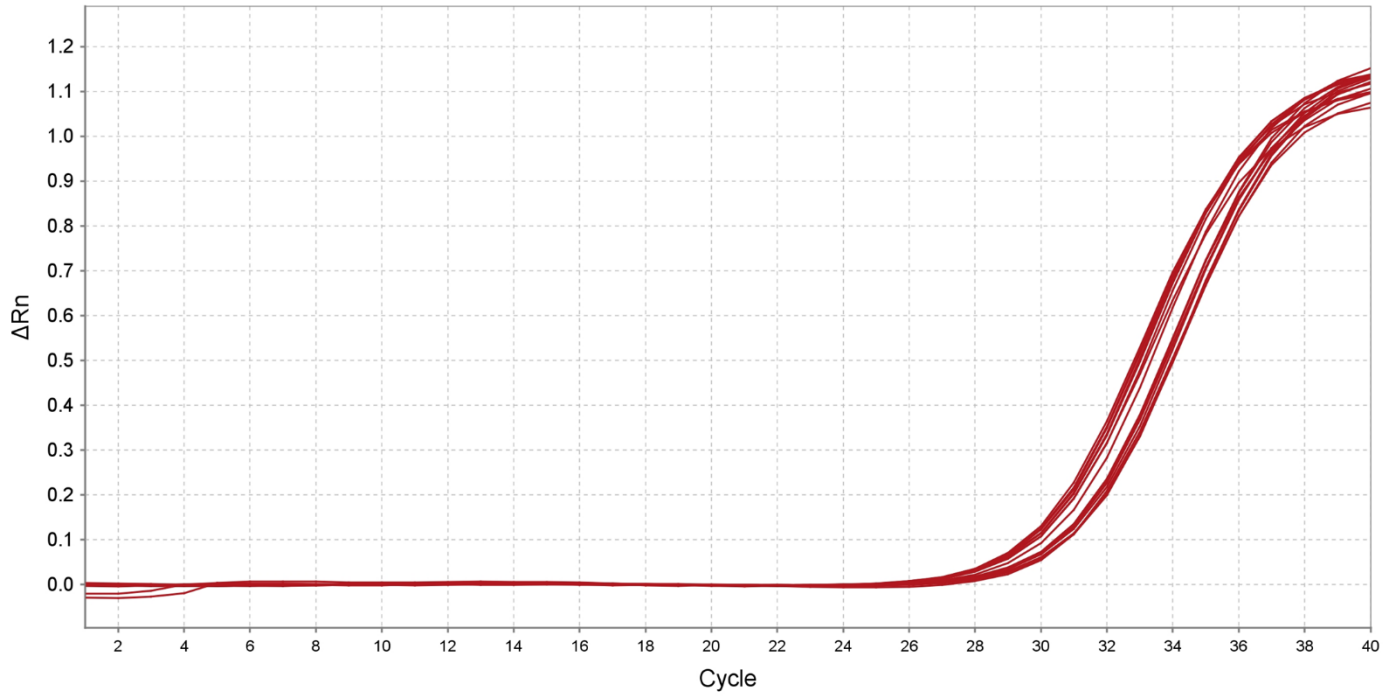

**Amplification plot of TRP2**



### Amplification Plot

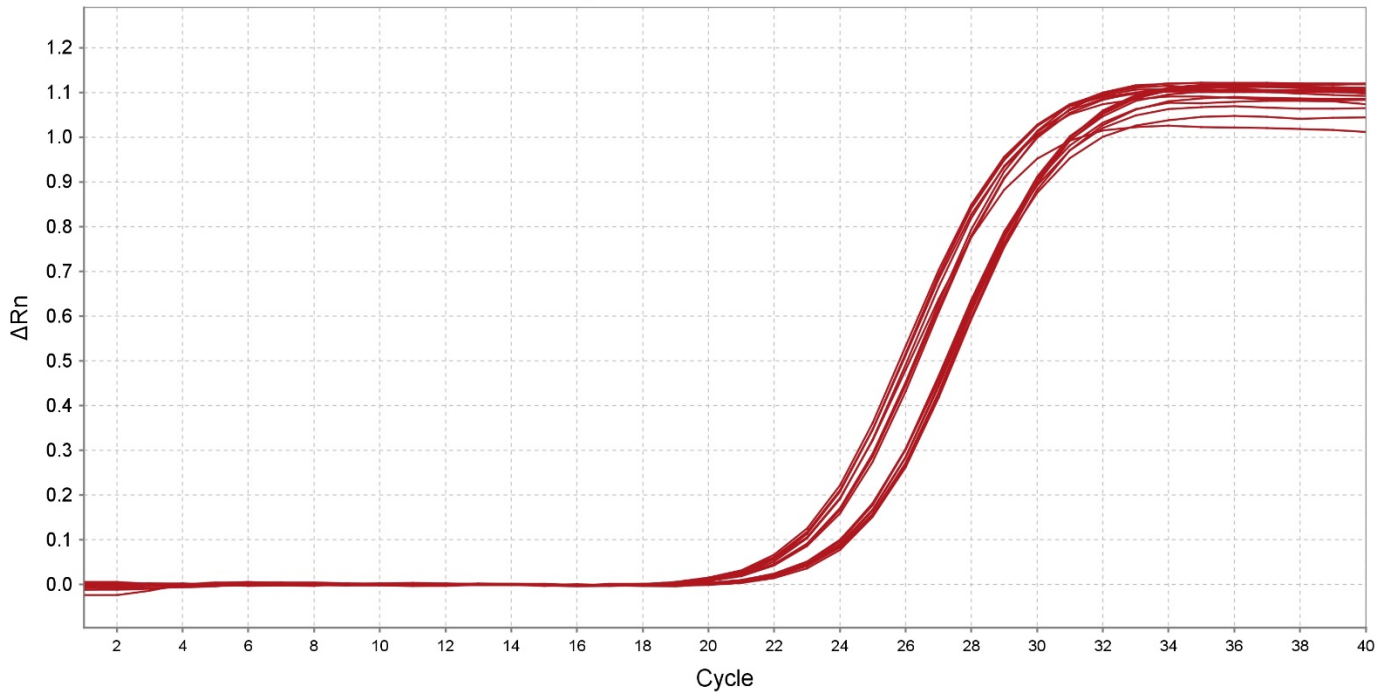

Amplification plot of MC1R

### Amplification Plot

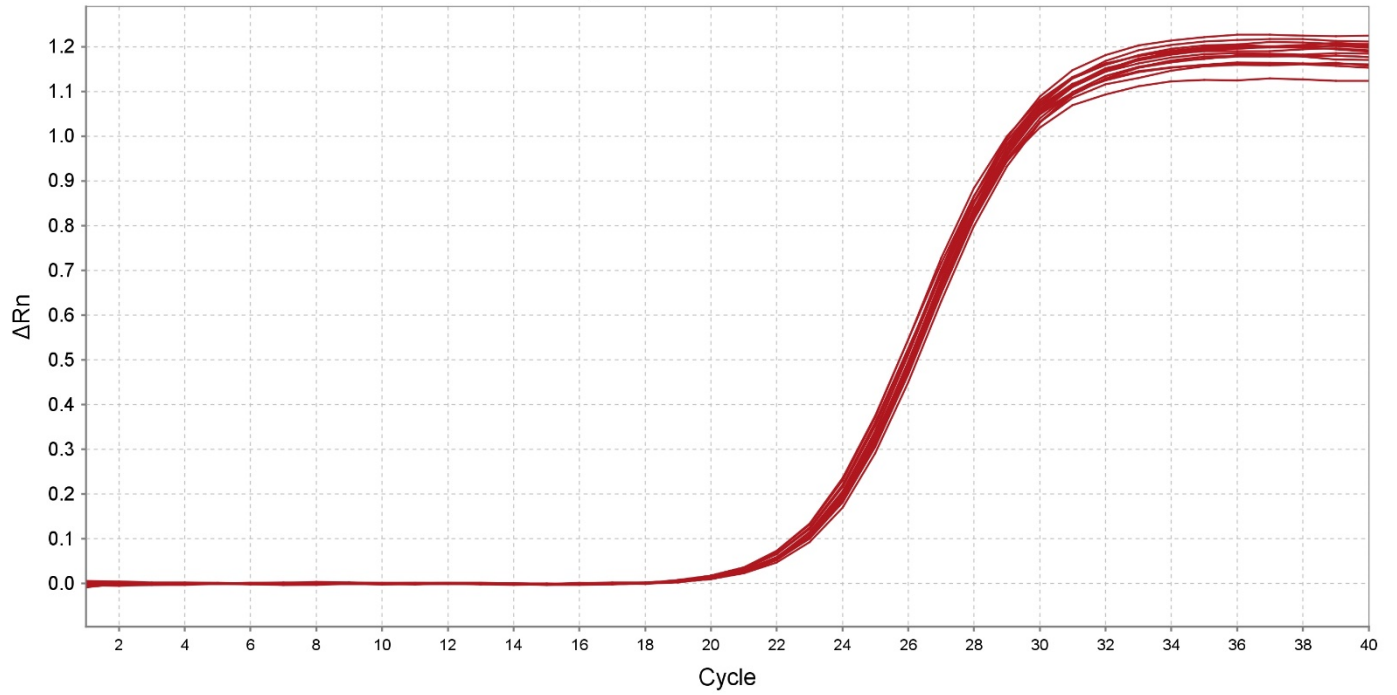

Amplification plot of CREB

### Amplification Plot

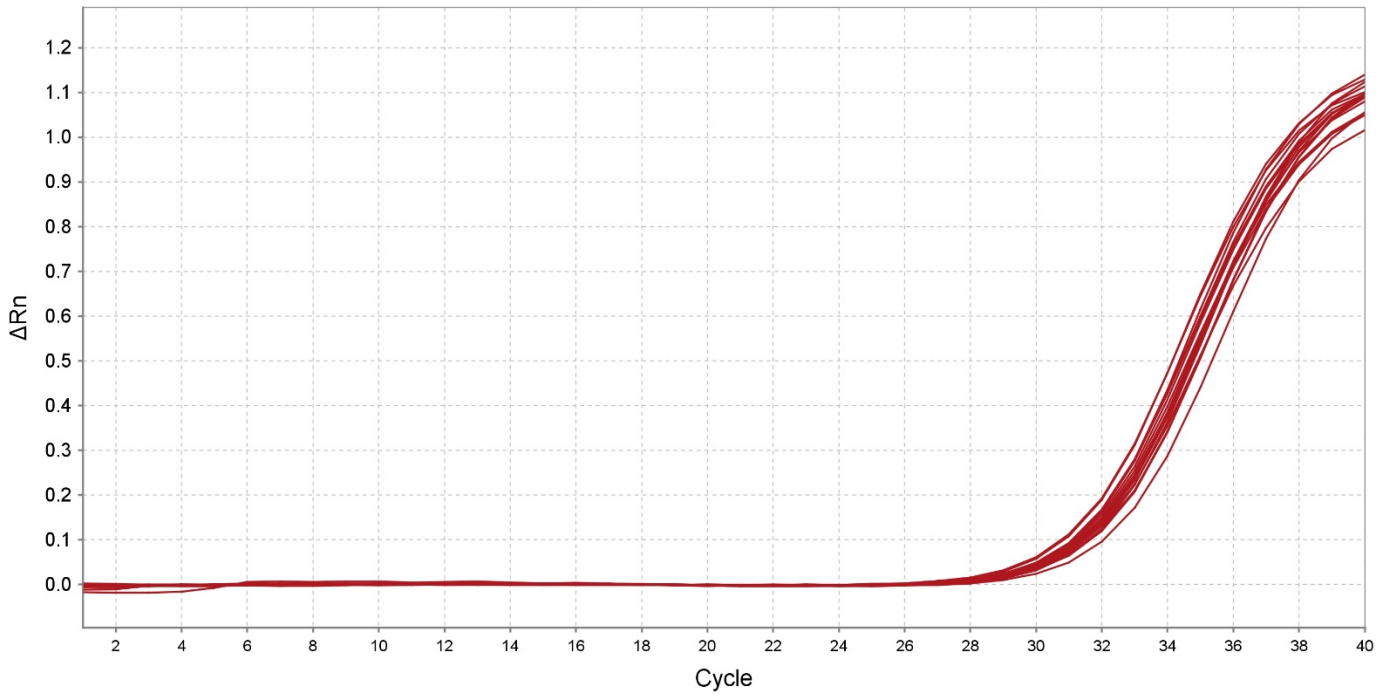

Amplification plot of WNT4

### Amplification Plot

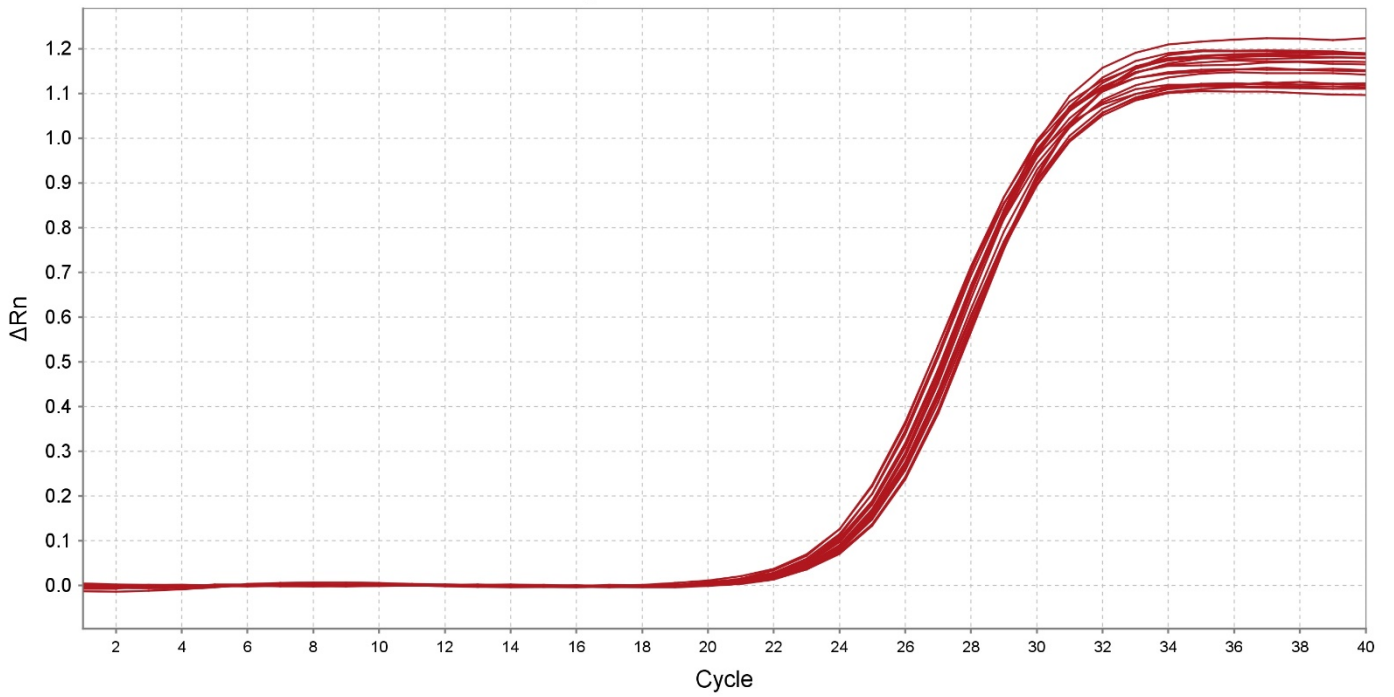

Amplification plot of JNK

### Amplification Plot

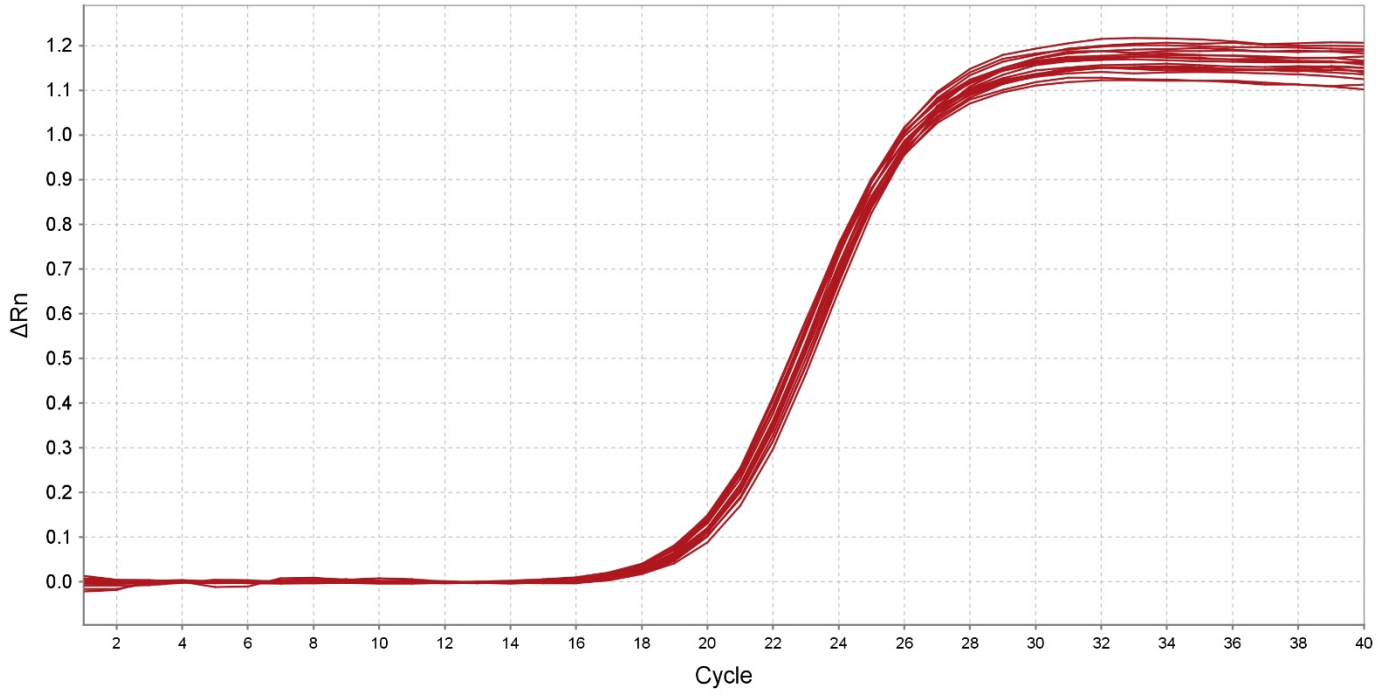

Amplification plot of ERK

### Amplification Plot

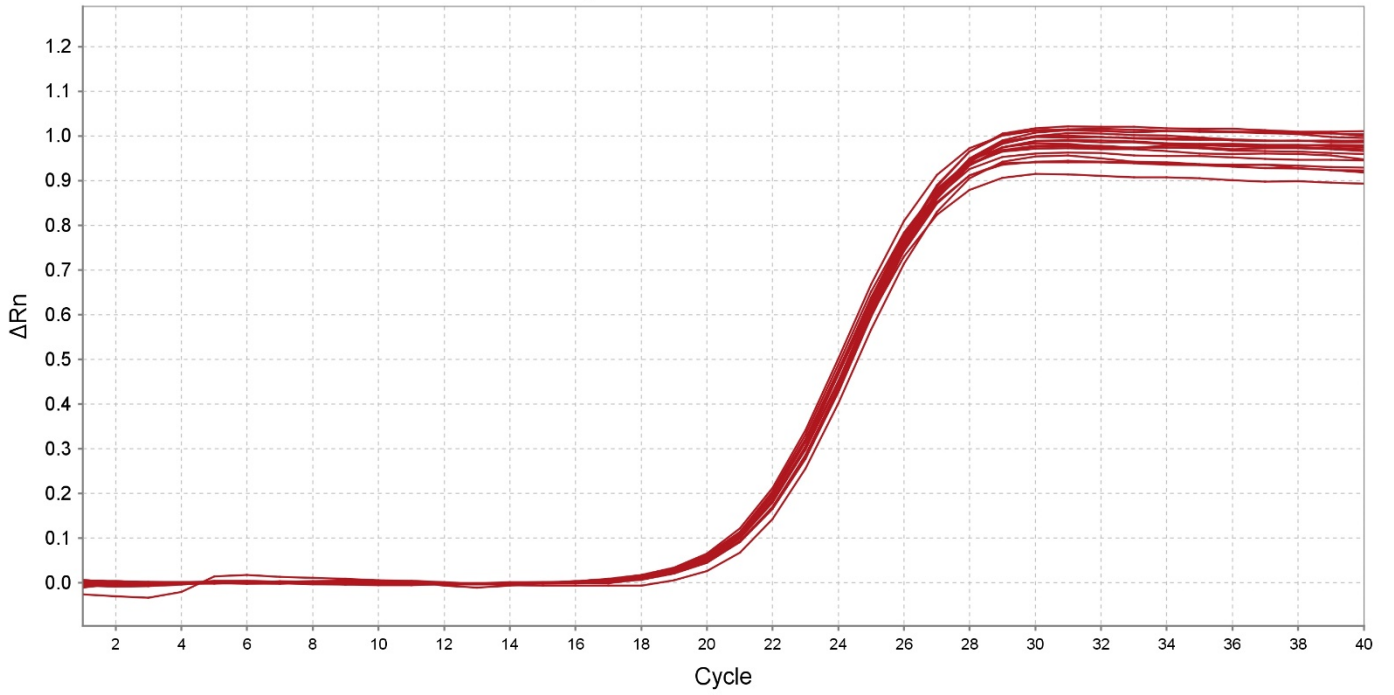

Amplification plot of  $\beta$ -catenin

## Amplification Plot

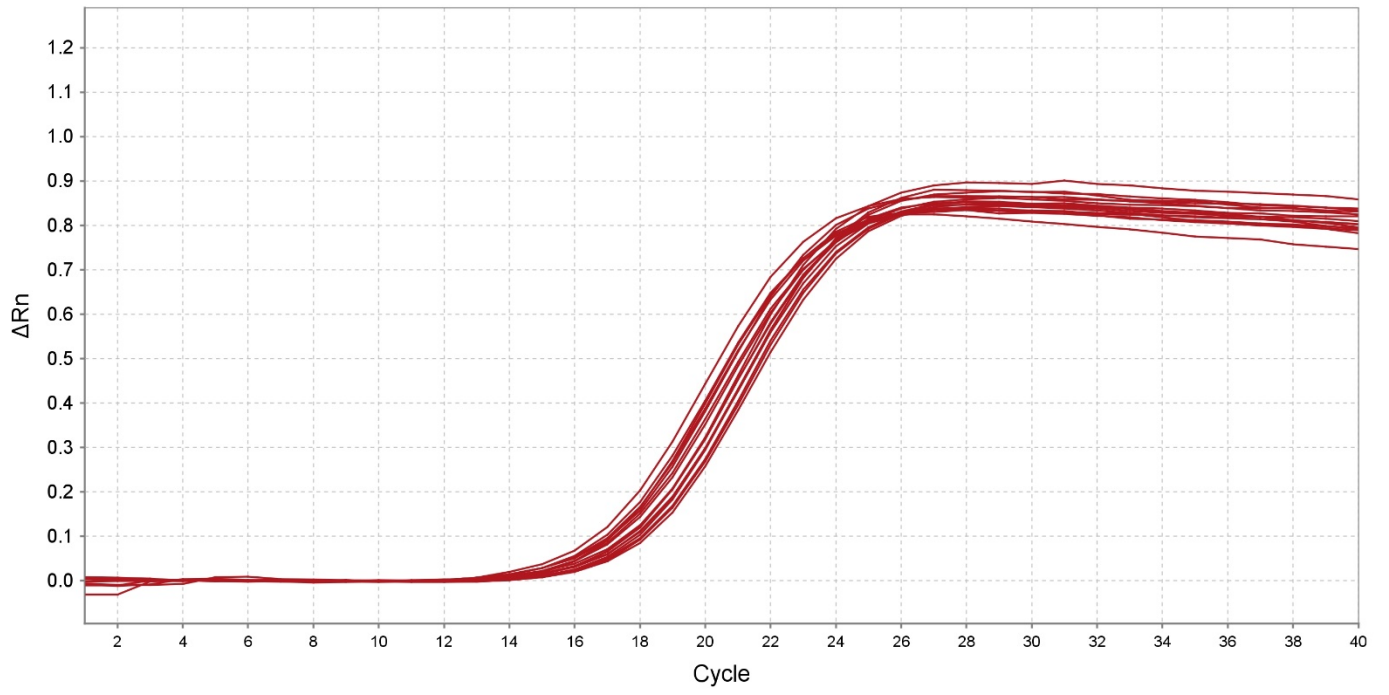

Amplification plot of GAPDH

#### 4. Melt Curve Plot in qRT-PCR

##### Melt Curve Plot

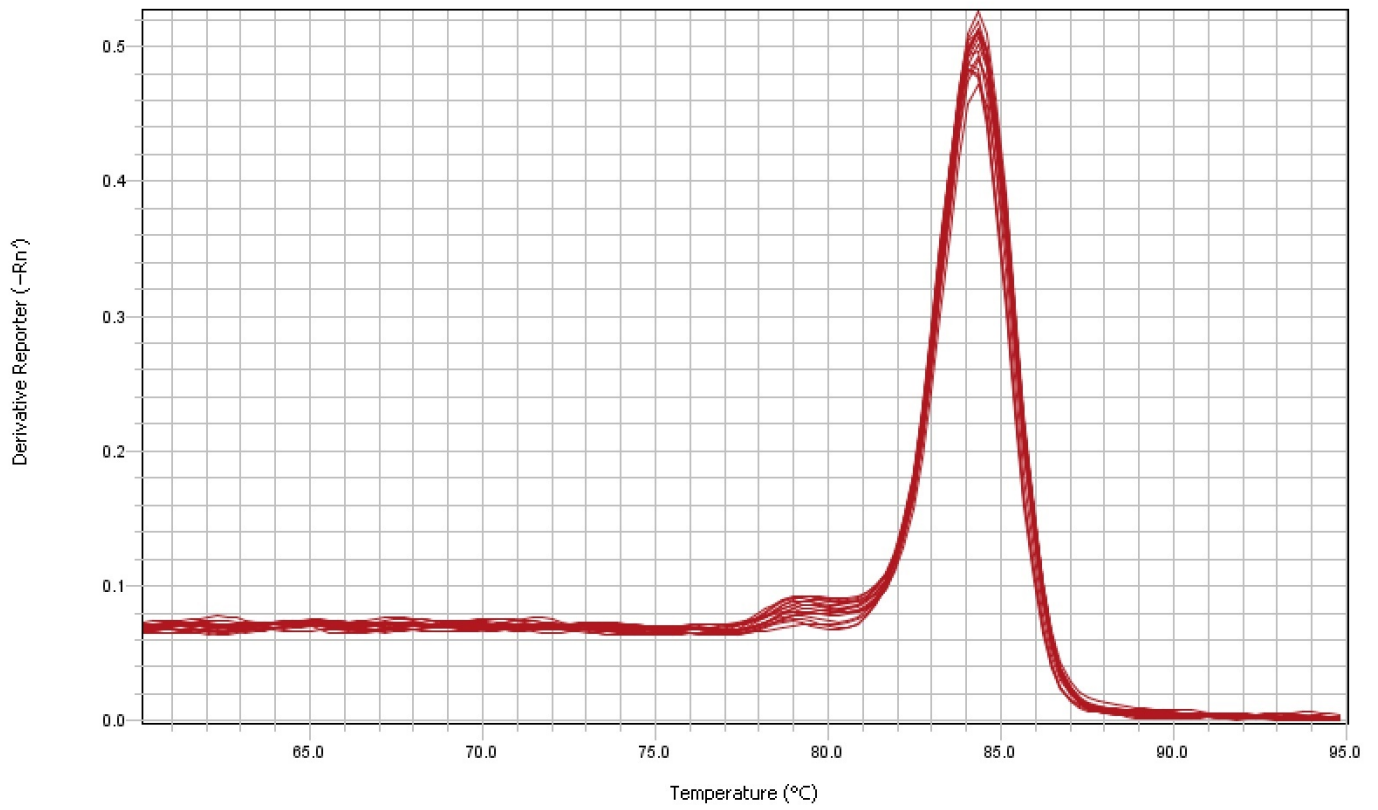

##### Melt Curve Plot of MITF

##### Melt Curve Plot

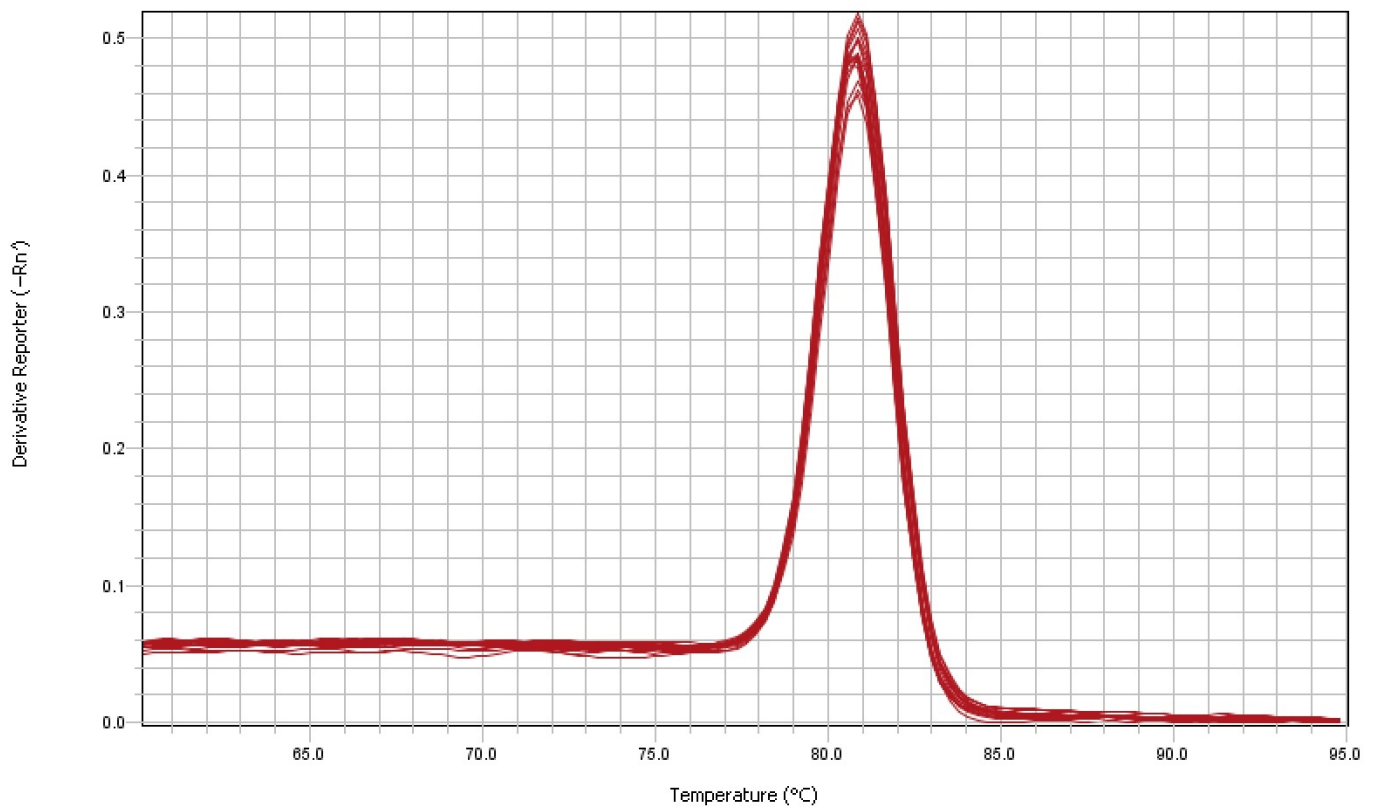

##### Melt Curve Plot of TYR

**Melt Curve Plot**

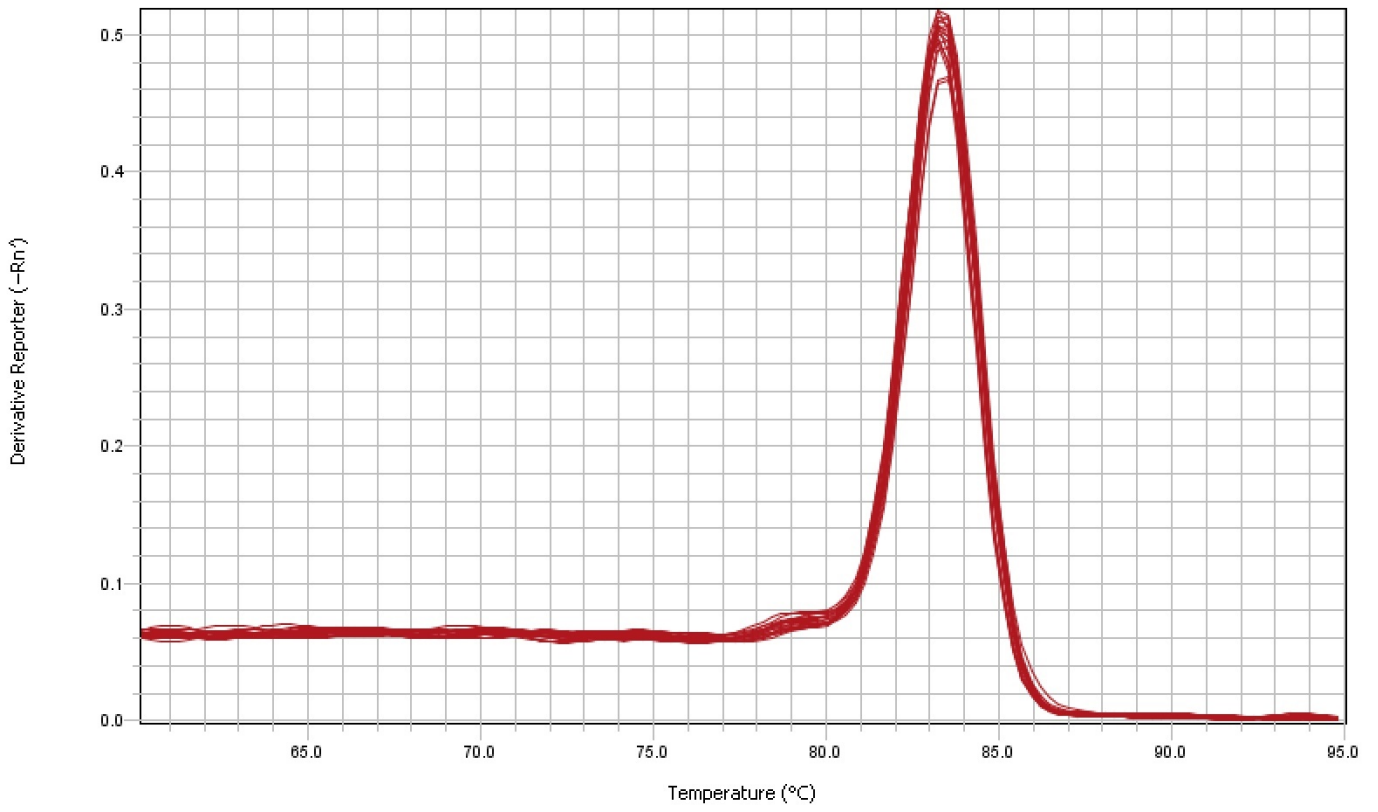

**Melt Curve Plot of TRP1**

**Melt Curve Plot**

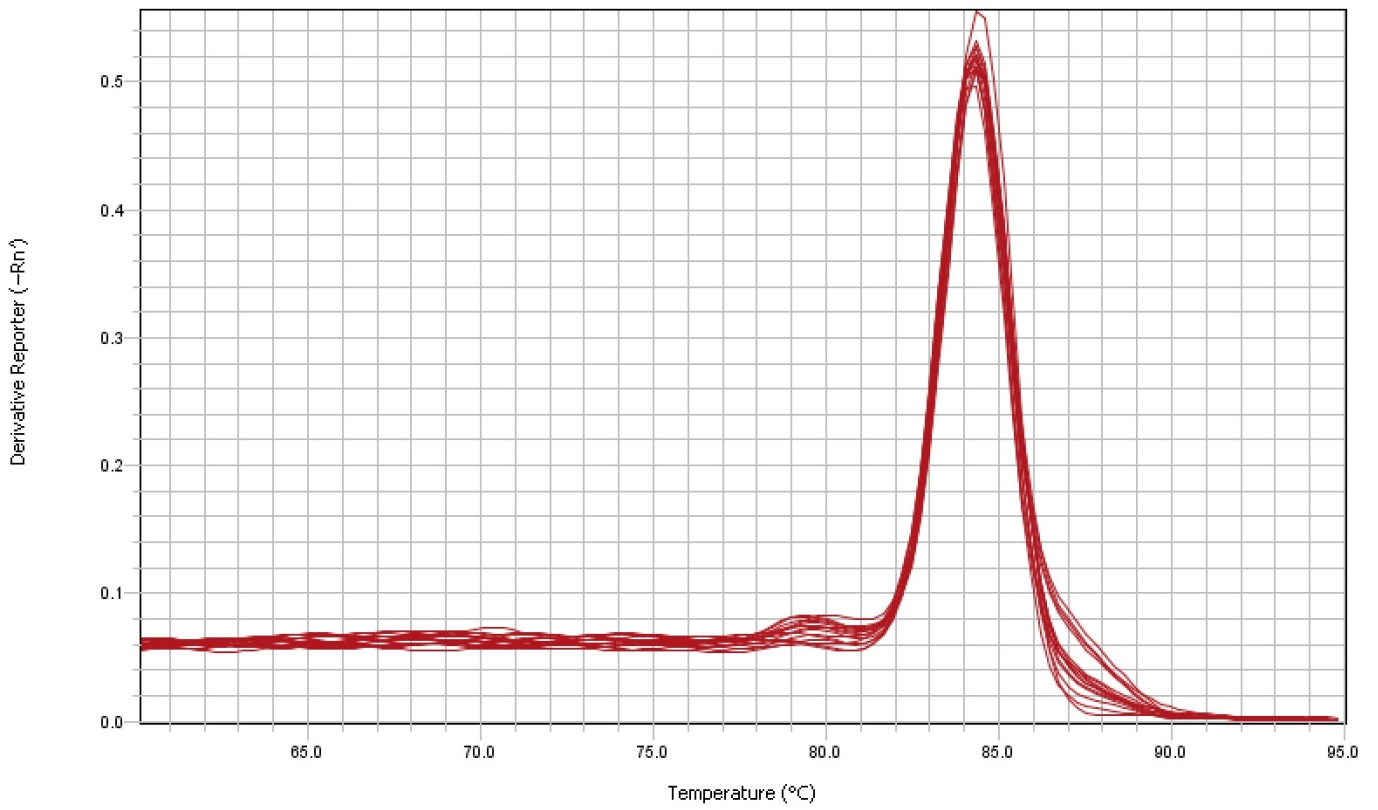

**Melt Curve Plot of TRP2**

**Melt Curve Plot**

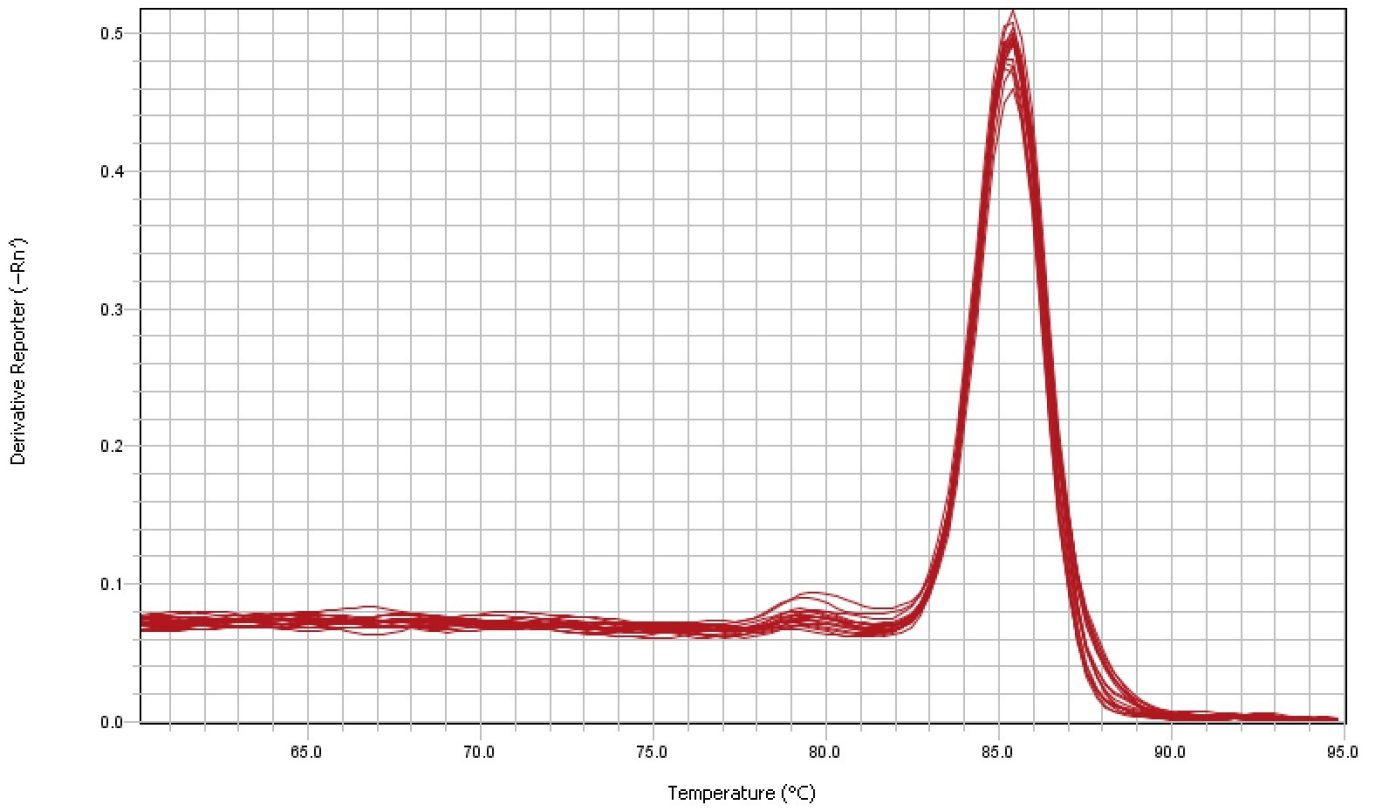

**Melt Curve Plot of MC1R**

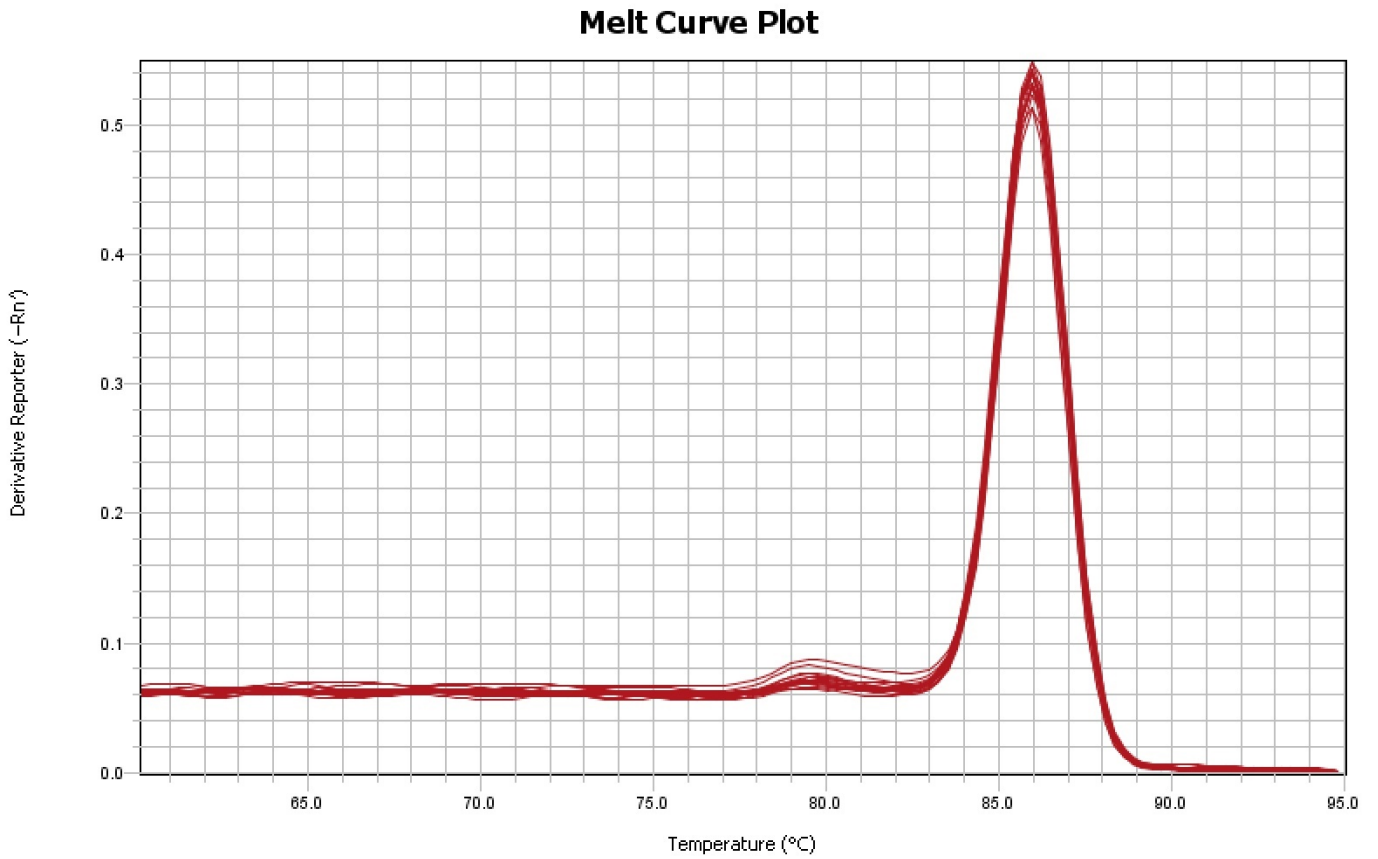

**Melt Curve Plot of CREB**



**Melt Curve Plot**

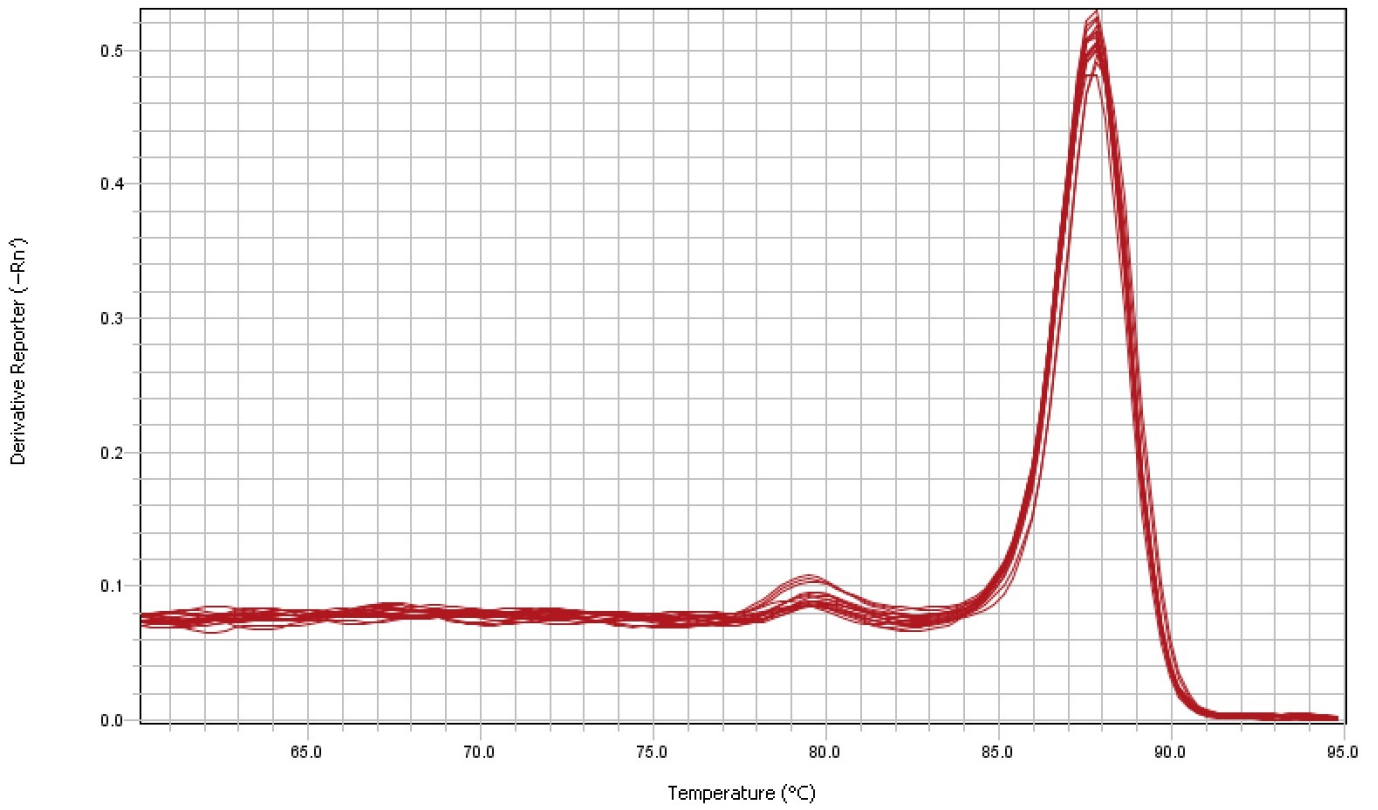

**Melt Curve Plot of WNT4**

**Melt Curve Plot**

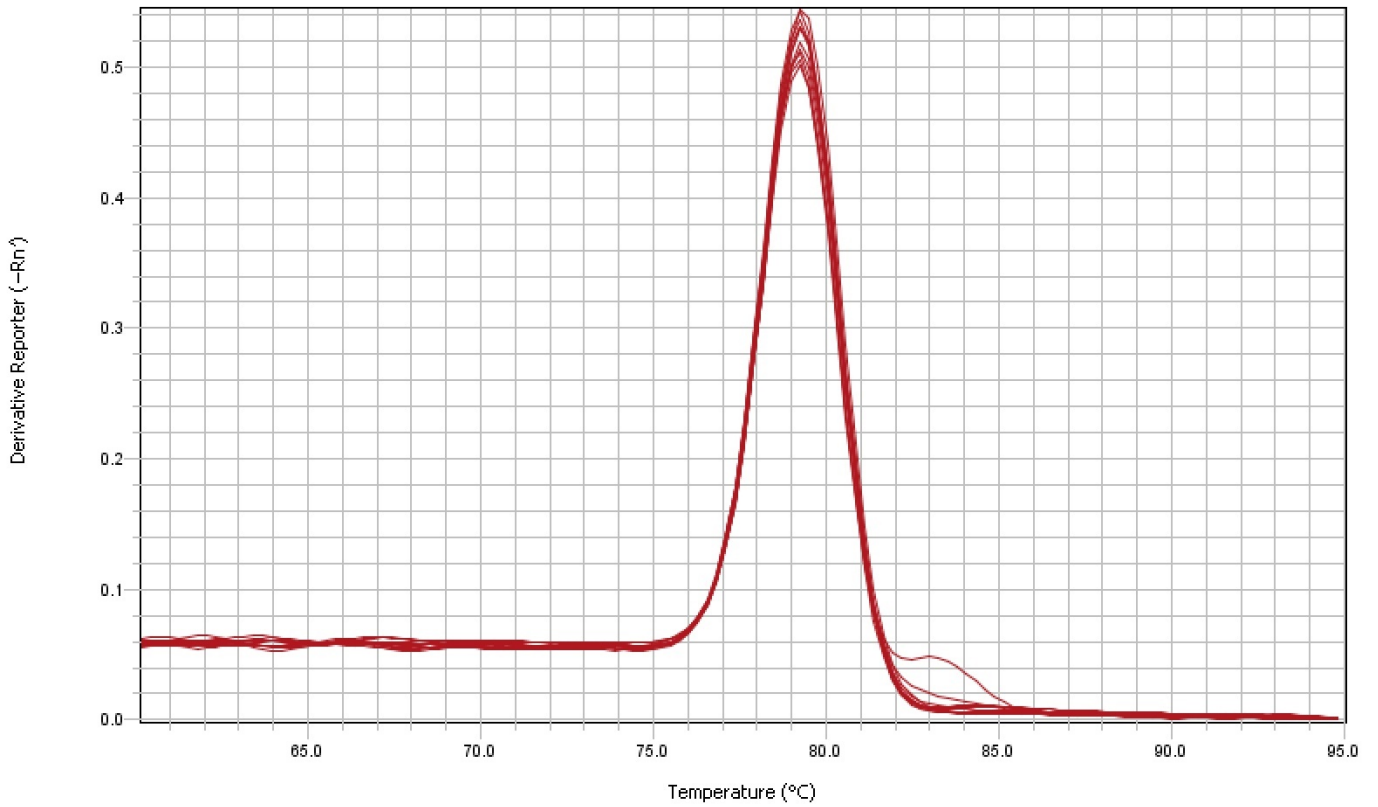

**Melt Curve Plot of JNK**



**Melt Curve Plot**

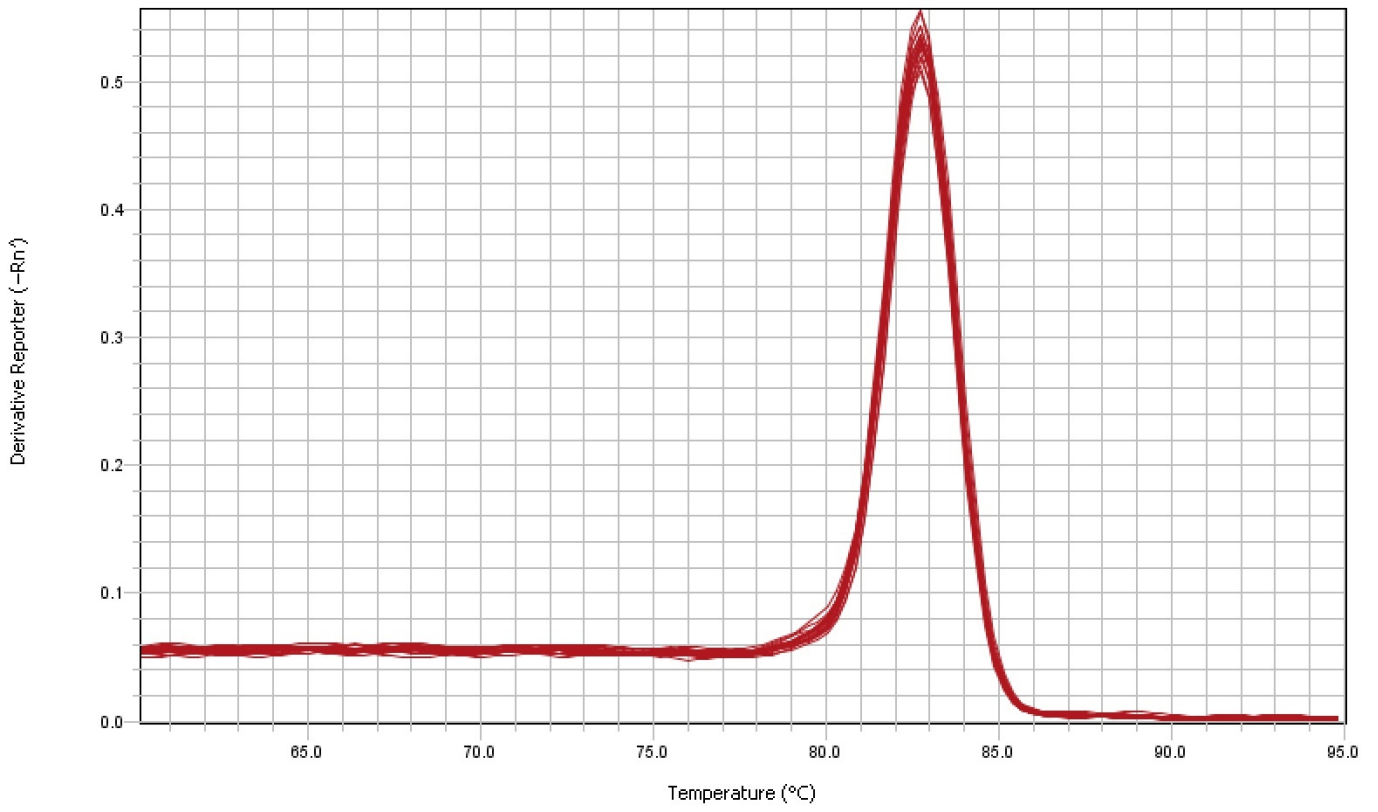

**Melt Curve Plot of ERK**

**Melt Curve Plot**

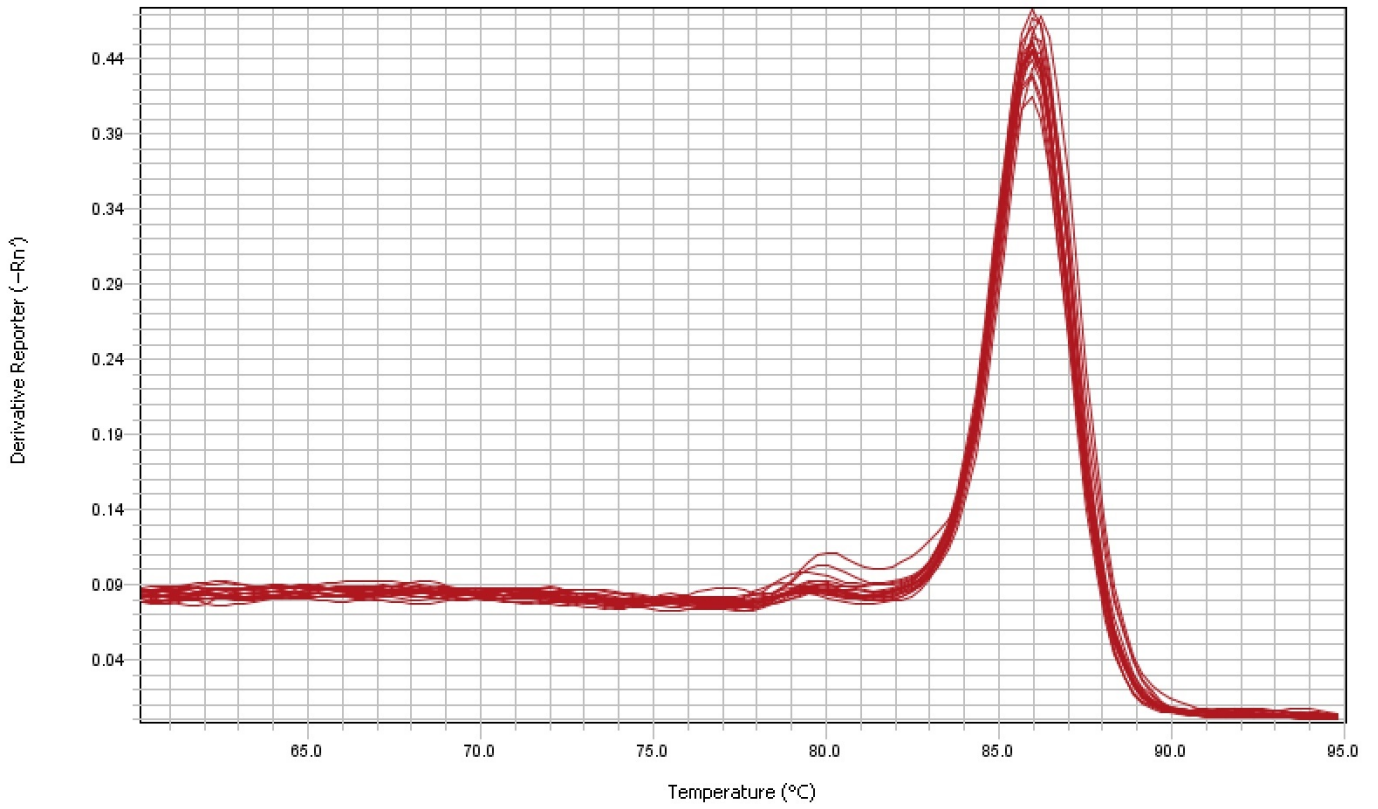

**Melt Curve Plot of  $\beta$ -catenin**

### Melt Curve Plot

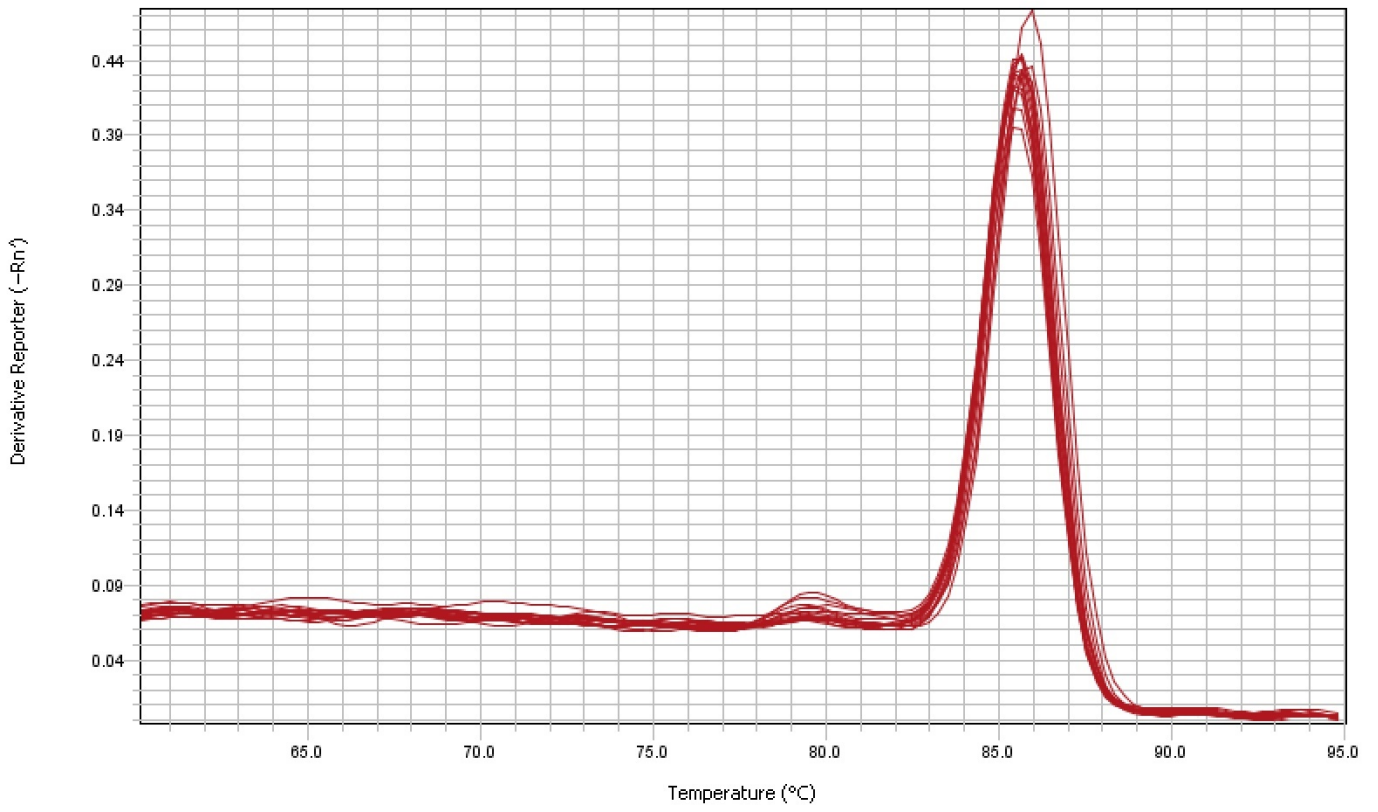

### Melt Curve Plot of GAPDH

## 5. The data in qRT-PCR

| Gene | Group   | Sample | Ct1   | Ct2   | Ct3   | Ct Mean | ΔCt   | 2 <sup>-ΔCt</sup> | 2 <sup>-ΔΔCt</sup> | 2 <sup>-ΔΔCt</sup> Mean | SD    | Related mRNA Level (% of control) | SD     | p-value |
|------|---------|--------|-------|-------|-------|---------|-------|-------------------|--------------------|-------------------------|-------|-----------------------------------|--------|---------|
| Mitf | FLF     | T1     | 21.70 | 21.65 | 21.69 | 21.68   | 5.09  | 2.935E-02         | 0.84               | 0.78                    | 0.086 | 77.554                            | 8.623  | 0.025   |
|      |         | T2     | 21.56 | 21.58 | 21.54 | 21.56   | 5.01  | 3.096E-02         | 0.88               |                         |       |                                   |        |         |
|      |         | T3     | 22.08 | 22.08 | 22.09 | 22.09   | 5.32  | 2.510E-02         | 0.72               |                         |       |                                   |        |         |
|      | Control | N1     | 22.42 | 22.64 | 22.38 | 22.48   | 4.86  | 3.436E-02         | 0.98               | 1.00                    | 0.036 | 100.000                           | 3.618  | /       |
|      |         | N2     | 22.49 | 22.16 | 22.13 | 22.26   | 4.77  | 3.657E-02         | 1.04               |                         |       |                                   |        |         |
|      |         | N3     | 21.93 | 22.03 | 22.11 | 22.02   | 4.86  | 3.438E-02         | 0.98               |                         |       |                                   |        |         |
| TYR  | FLF     | T1     | 18.12 | 18.16 | 18.14 | 18.14   | 1.55  | 3.419E-01         | 1.45               | 1.18                    | 0.025 | 118.289                           | 2.464  | 0.024   |
|      |         | T2     | 18.31 | 18.31 | 18.50 | 18.37   | 1.82  | 2.824E-01         | 1.20               |                         |       |                                   |        |         |
|      |         | T3     | 18.57 | 18.67 | 18.68 | 18.64   | 1.87  | 2.742E-01         | 1.17               |                         |       |                                   |        |         |
|      | Control | N1     | 19.76 | 19.60 | 19.64 | 19.67   | 2.05  | 2.416E-01         | 1.03               | 1.00                    | 0.031 | 100.000                           | 3.093  | /       |
|      |         | N2     | 19.62 | 19.52 | 19.65 | 19.60   | 2.11  | 2.313E-01         | 0.98               |                         |       |                                   |        |         |
|      |         | N3     | 19.20 | 19.31 | 19.28 | 19.26   | 2.10  | 2.328E-01         | 0.99               |                         |       |                                   |        |         |
| TRP1 | FLF     | T1     | 25.04 | 24.93 | 24.96 | 24.98   | 8.39  | 2.982E-03         | 0.36               | 0.38                    | 0.021 | 37.897                            | 2.144  | 0.000   |
|      |         | T2     | 24.87 | 24.98 | 24.82 | 24.89   | 8.35  | 3.075E-03         | 0.37               |                         |       |                                   |        |         |
|      |         | T3     | 25.04 | 24.97 | 24.99 | 25.00   | 8.23  | 3.324E-03         | 0.40               |                         |       |                                   |        |         |
|      | Control | N1     | 24.46 | 24.43 | 24.51 | 24.47   | 6.85  | 8.672E-03         | 1.05               | 1.00                    | 0.049 | 100.000                           | 4.890  | /       |
|      |         | N2     | 24.41 | 24.43 | 24.41 | 24.41   | 6.93  | 8.216E-03         | 1.00               |                         |       |                                   |        |         |
|      |         | N3     | 24.12 | 24.18 | 24.15 | 24.15   | 6.99  | 7.868E-03         | 0.95               |                         |       |                                   |        |         |
| TRP2 | FLF     | T1     | 30.16 | 30.40 | 30.37 | 30.31   | 13.72 | 7.406E-05         | 0.28               | 0.31                    | 0.035 | 31.043                            | 3.469  | 0.000   |
|      |         | T2     | 30.05 | 30.15 | 30.40 | 30.20   | 13.65 | 7.761E-05         | 0.30               |                         |       |                                   |        |         |
|      |         | T3     | 30.04 | 30.19 | 30.34 | 30.19   | 13.42 | 9.120E-05         | 0.35               |                         |       |                                   |        |         |
|      | Control | N1     | 29.32 | 29.69 | 29.42 | 29.48   | 11.86 | 2.689E-04         | 1.03               | 1.00                    | 0.099 | 100.000                           | 9.901  | /       |
|      |         | N2     | 29.28 | 29.33 | 29.23 | 29.28   | 11.79 | 2.816E-04         | 1.08               |                         |       |                                   |        |         |
|      |         | N3     | 29.18 | 29.42 | 29.11 | 29.24   | 12.07 | 2.319E-04         | 0.89               |                         |       |                                   |        |         |
| MC1R | FLF     | T1     | 22.45 | 22.40 | 22.54 | 22.46   | 5.87  | 1.705E-02         | 1.36               | 1.38                    | 0.125 | 137.629                           | 12.461 | 0.010   |
|      |         | T2     | 22.30 | 22.32 | 22.20 | 22.27   | 5.73  | 1.890E-02         | 1.51               |                         |       |                                   |        |         |
|      |         | T3     | 22.81 | 22.71 | 22.75 | 22.75   | 5.98  | 1.579E-02         | 1.26               |                         |       |                                   |        |         |
|      | Control | N1     | 23.86 | 23.84 | 23.95 | 23.88   | 6.27  | 1.299E-02         | 1.04               | 1.00                    | 0.067 | 100.000                           | 6.703  | /       |
|      |         | N2     | 23.72 | 23.76 | 23.76 | 23.75   | 6.26  | 1.304E-02         | 1.04               |                         |       |                                   |        |         |
|      |         | N3     | 23.58 | 23.57 | 23.64 | 23.60   | 6.43  | 1.156E-02         | 0.92               |                         |       |                                   |        |         |
| CREB | FLF     | T1     | 22.38 | 22.36 | 22.38 | 22.38   | 5.79  | 1.813E-02         | 0.58               | 0.60                    | 0.046 | 59.564                            | 4.552  | 0.001   |
|      |         | T2     | 22.23 | 22.09 | 22.19 | 22.17   | 5.62  | 2.032E-02         | 0.65               |                         |       |                                   |        |         |
|      |         | T3     | 22.69 | 22.56 | 22.53 | 22.60   | 5.82  | 1.764E-02         | 0.56               |                         |       |                                   |        |         |
|      | Control | N1     | 22.55 | 22.45 | 22.55 | 22.52   | 4.90  | 3.353E-02         | 1.07               | 1.00                    | 0.067 | 100.000                           | 6.740  | /       |
|      |         | N2     | 22.50 | 22.49 | 22.46 | 22.48   | 5.00  | 3.134E-02         | 1.00               |                         |       |                                   |        |         |
|      |         | N3     | 22.20 | 22.51 | 22.05 | 22.25   | 5.09  | 2.930E-02         | 0.93               |                         |       |                                   |        |         |
| WNT4 | FLF     | T1     | 30.76 | 30.98 | 31.63 | 31.13   | 14.54 | 4.211E-05         | 0.48               | 0.52                    | 0.042 | 52.156                            | 4.169  | 0.021   |
|      |         | T2     | 31.50 | 30.71 | 30.35 | 30.85   | 14.31 | 4.935E-05         | 0.56               |                         |       |                                   |        |         |
|      |         | T3     | 31.21 | 31.25 | 30.99 | 31.15   | 14.38 | 4.694E-05         | 0.53               |                         |       |                                   |        |         |
|      | Control | N1     | 31.21 | 30.66 | 30.43 | 30.77   | 13.15 | 1.101E-04         | 1.24               | 1.00                    | 0.219 | 100.000                           | 21.928 | /       |
|      |         | N2     | 31.04 | 31.19 | 30.92 | 31.05   | 13.56 | 8.257E-05         | 0.93               |                         |       |                                   |        |         |
|      |         | N3     | 30.86 | 30.78 | 31.08 | 30.91   | 13.75 | 7.267E-05         | 0.82               |                         |       |                                   |        |         |

|                  |         |    |       |       |       |       |      |           |      |      |       |         |       |       |
|------------------|---------|----|-------|-------|-------|-------|------|-----------|------|------|-------|---------|-------|-------|
| JNK              | FLF     | T1 | 23.94 | 23.95 | 23.88 | 23.92 | 7.34 | 6.193E-03 | 0.42 | 0.44 | 0.032 | 44.220  | 3.240 | 0.000 |
|                  |         | T2 | 23.80 | 23.78 | 23.47 | 23.69 | 7.14 | 7.095E-03 | 0.48 |      |       |         |       |       |
|                  |         | T3 | 24.06 | 24.09 | 24.06 | 24.07 | 7.30 | 6.361E-03 | 0.43 |      |       |         |       |       |
|                  | Control | N1 | 23.73 | 23.72 | 23.79 | 23.75 | 6.13 | 1.428E-02 | 0.96 | 1.00 | 0.081 | 100.000 | 8.135 | /     |
|                  |         | N2 | 23.55 | 23.62 | 23.14 | 23.44 | 5.95 | 1.619E-02 | 1.09 |      |       |         |       |       |
|                  |         | N3 | 23.18 | 23.35 | 23.44 | 23.32 | 6.16 | 1.396E-02 | 0.94 |      |       |         |       |       |
| ERK              | FLF     | T1 | 19.11 | 19.27 | 19.28 | 19.22 | 2.63 | 1.613E-01 | 0.57 | 0.56 | 0.060 | 55.863  | 5.997 | 0.002 |
|                  |         | T2 | 19.08 | 19.01 | 19.15 | 19.08 | 2.53 | 1.726E-01 | 0.61 |      |       |         |       |       |
|                  |         | T3 | 19.55 | 19.51 | 19.78 | 19.61 | 2.84 | 1.393E-01 | 0.49 |      |       |         |       |       |
|                  | Control | N1 | 19.32 | 19.43 | 19.33 | 19.36 | 1.74 | 2.993E-01 | 1.06 | 1.00 | 0.085 | 100.000 | 8.532 | /     |
|                  |         | N2 | 19.44 | 19.60 | 19.33 | 19.46 | 1.97 | 2.547E-01 | 0.90 |      |       |         |       |       |
|                  |         | N3 | 18.93 | 18.97 | 18.90 | 18.93 | 1.77 | 2.929E-01 | 1.04 |      |       |         |       |       |
| $\beta$ -catenin | FLF     | T1 | 20.42 | 20.46 | 20.42 | 20.44 | 3.85 | 6.951E-02 | 0.64 | 0.63 | 0.063 | 62.531  | 6.318 | 0.003 |
|                  |         | T2 | 20.31 | 20.43 | 20.22 | 20.32 | 3.77 | 7.323E-02 | 0.68 |      |       |         |       |       |
|                  |         | T3 | 20.70 | 20.70 | 21.09 | 20.83 | 4.06 | 5.999E-02 | 0.56 |      |       |         |       |       |
|                  | Control | N1 | 20.71 | 20.67 | 20.58 | 20.65 | 3.03 | 1.221E-01 | 1.13 | 1.04 | 0.087 | 104.335 | 8.742 | /     |
|                  |         | N2 | 20.68 | 20.52 | 20.70 | 20.63 | 3.15 | 1.129E-01 | 1.04 |      |       |         |       |       |
|                  |         | N3 | 20.49 | 20.32 | 20.51 | 20.44 | 3.28 | 1.032E-01 | 0.96 |      |       |         |       |       |
| GAPDH            | FLF     | T1 | 16.57 | 16.47 | 16.73 | 16.59 |      |           |      |      |       |         |       |       |
|                  |         | T2 | 16.42 | 17.08 | 16.15 | 16.55 |      |           |      |      |       |         |       |       |
|                  |         | T3 | 16.86 | 16.79 | 16.66 | 16.77 |      |           |      |      |       |         |       |       |
|                  | Control | N1 | 17.34 | 17.82 | 17.69 | 17.62 |      |           |      |      |       |         |       |       |
|                  |         | N2 | 17.35 | 17.49 | 17.61 | 17.49 |      |           |      |      |       |         |       |       |
|                  |         | N3 | 17.22 | 17.09 | 17.17 | 17.16 |      |           |      |      |       |         |       |       |

Western blot

1. The raw figure in Western blot

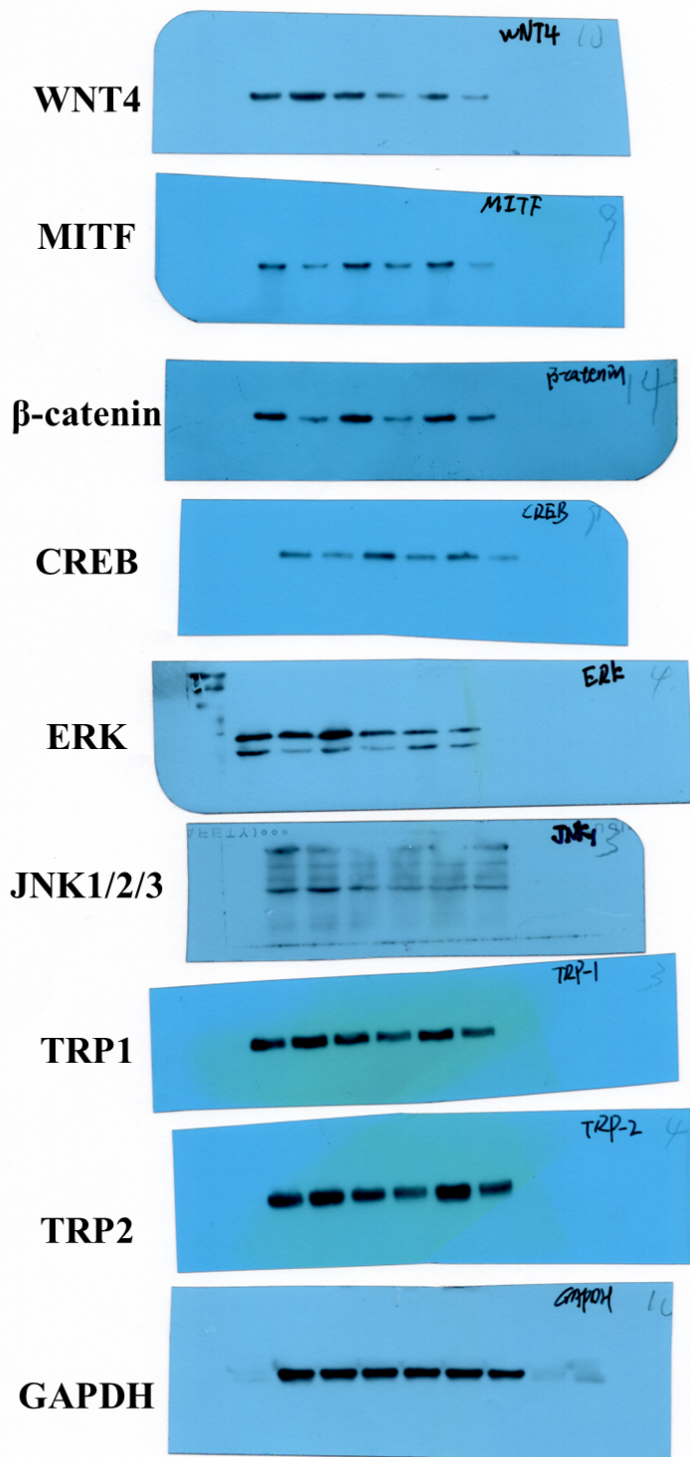

2. Western blot image. (Figure 4. B1)

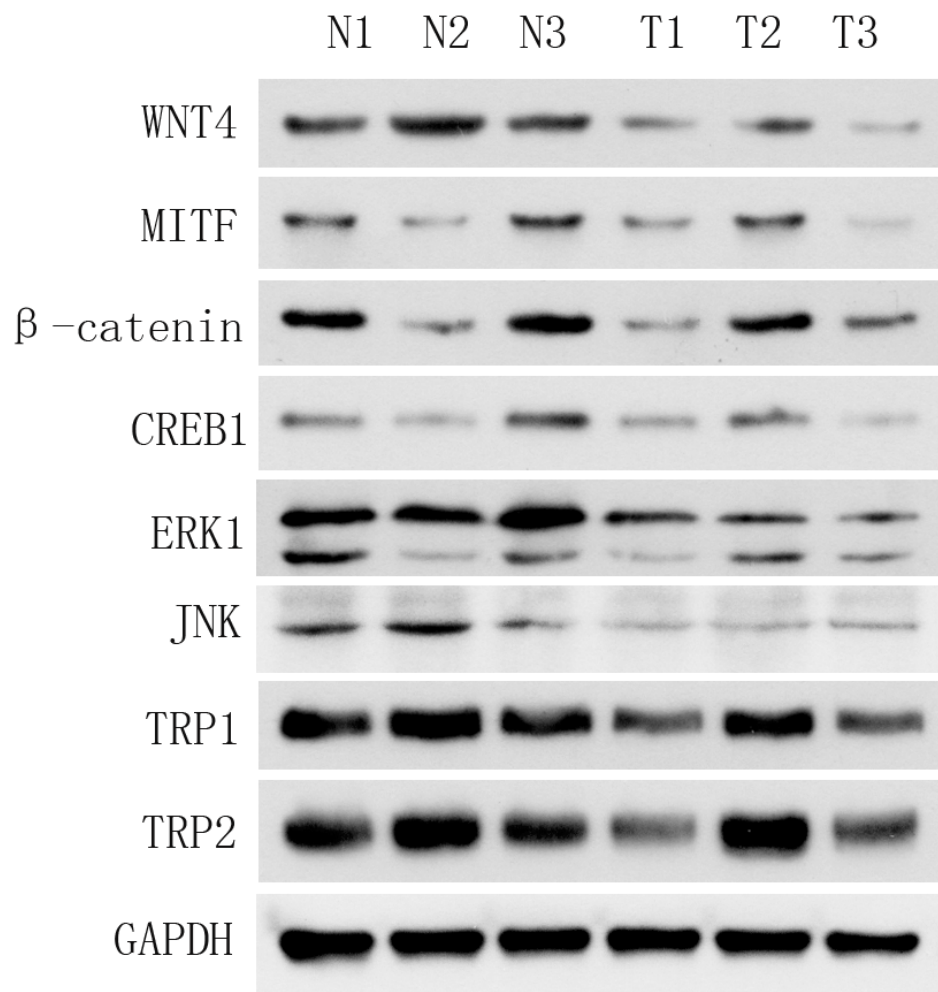

### 3. The data in Western Blot

| the control group (N1, N2, N3) |          |          |          |           |         |                                               |       |         |
|--------------------------------|----------|----------|----------|-----------|---------|-----------------------------------------------|-------|---------|
| IOD                            | 1        | 2        | 3        | N<br>Mean | SD      | Related protein/GAPGH Ratio<br>(% of control) |       |         |
|                                | N1       | N2       | N3       |           |         | N Mean                                        | SD    | p-value |
| WNT4                           | 391.656  | 600.970  | 436.780  | 476.469   | 77.892  | 15.069                                        | 2.463 | /       |
| MITF                           | 238.616  | 91.651   | 343.726  | 224.664   | 89.530  | 7.105                                         | 2.831 | /       |
| β-catenin                      | 1343.457 | 139.714  | 1667.530 | 1505.494  | 132.302 | 47.612                                        | 4.184 | /       |
| CREB1                          | 188.885  | 91.024   | 376.268  | 218.725   | 102.491 | 6.917                                         | 3.241 | /       |
| ERK1                           | 1608.422 | 1389.669 | 2158.301 | 1718.797  | 280.032 | 54.358                                        | 8.856 | /       |
|                                | 82.030   | 44.435   | 168.263  | 98.242    | 44.891  | 3.107                                         | 1.420 | /       |
| JNK1/2/3                       | 378.022  | 630.282  | 238.529  | 415.611   | 140.405 | 13.144                                        | 4.440 | /       |
| TRP-1                          | 2225.597 | 3199.248 | 1869.204 | 2047.401  | 145.497 | 64.751                                        | 4.601 | /       |
| TRP-2                          | 1868.111 | 3506.461 | 1420.075 | 1644.093  | 182.910 | 51.996                                        | 5.785 | /       |
| GAPDH                          | 3367.727 | 3010.313 | 3107.884 | 3161.975  | 130.634 | 100.000                                       | 4.131 | /       |
| the FLF group (T1, T2, T3)     |          |          |          |           |         |                                               |       |         |
| IOD                            | 4        | 5        | 6        | T<br>Mean | SD      | Related protein/GAPGH Ratio<br>(% of control) |       |         |
|                                | T1       | T2       | T3       |           |         | T Mean                                        | SD    | p-value |
| WNT4                           | 123.271  | 221.581  | 52.687   | 132.513   | 59.981  | 4.457                                         | 2.017 | 0.013   |
| MITF                           | 72.190   | 249.540  | 52.162   | 124.631   | 76.818  | 4.191                                         | 2.583 | 0.050   |
| β-catenin                      | 123.529  | 1128.049 | 203.006  | 163.267   | 32.446  | 5.491                                         | 1.091 | 0.015   |
| CREB1                          | 86.963   | 180.011  | 54.962   | 107.312   | 45.934  | 3.609                                         | 1.545 | 0.932   |
| ERK1                           | 401.834  | 250.466  | 144.721  | 265.674   | 91.379  | 8.935                                         | 3.073 | 0.004   |
|                                | 43.343   | 232.876  | 80.142   | 118.787   | 71.066  | 3.995                                         | 2.390 | 0.780   |
| JNK1/2/3                       | 46.164   | 80.695   | 63.852   | 63.570    | 12.210  | 2.138                                         | 0.411 | 0.038   |
| TRP-1                          | 614.394  | 2561.109 | 577.640  | 596.017   | 15.005  | 20.045                                        | 0.505 | 0.015   |
| TRP-2                          | 616.957  | 3865.034 | 894.087  | 755.522   | 113.138 | 25.409                                        | 3.805 | 0.078   |
| GAPDH                          | 2992.237 | 2989.768 | 2938.360 | 2973.455  | 21.509  | 100.000                                       | 0.723 | 0.156   |

\*The deviation of data marked in blue is too large and the data should be discarded.
